# Supplementary material for: Cell Panel Profiling Reveals Conserved Therapeutic Clusters and Differentiates the Mechanism of Action of Different PI3K/mTOR, Aurora Kinase and EZH2 Inhibitors
Source: Oxford University Press journal article supplement (doi:10.1158/1535-7163.mct-16-0403), 2016-09-01
Supplement: 15357163mct160403-sup-168145_1_supp_3613632_8b88qx.xlsx [file 15357163mct160403-sup-168145_1_supp_3613632_8b88qx.xlsx]

## Sheet: S3A_allIC50values
Table S3A: all IC50 values as measured on the Oncolines panel described in the text. Unit: 10log of IC50 (nM)
cell line	5-fluorouracil	ABT-737	actinomycin-D	afatinib	apitolisib	ATRA	AMG-900	AT-7519	axitinib	AZD-8055	BGJ-398	BI-2536	BIIB-021	buparlisib	BLU-9931	bortezomib	bosutinib	busulfan	alpelisib	cabozantinib	idelalisib	carboplatin	carfilzomib	ceritinib	CHIR-124	cisplatin	crizotinib	cytarabine	dabrafenib	dacarbazine	dactolisib	dasatinib	daunorubicin	dinaciclib	docetaxel	doxorubicin	duvelisib	entinostat	epirubicin	epothiloneB	EPZ-005687	EPZ-5676	EPZ-6438	erlotinib	etoposide	everolimus	pictilisib	gefitinib	gemcitabine
769-P	3.6759	3.99721	1.32504	3.6015	2.56528	4.49969	3.13867	2.823	3.82905	2.3999	3.60715	1.63362	1.69744	3.17411	4.07244	1.26178	3.09391	4.49969	4.42368	4.47728	4.49969	3.85411	1.66966	3.5219	1.57035	3.60696	3.47169	1.53914	2.86281	4.49969	2.19121	1.88113	2.03825	1.0627	1.23024	2.46281	3.05414	3.37291	2.34258	0.019247	4.43876	4.49969	4.49969	4.30449	2.9113	2.57127	3.76864	4.05567	0.515901
786-O	3.34376	4.49969	1.27795	3.56606	2.89109	4.49969	1.64257	3.02731	3.95987	2.47897	3.61194	1.95254	1.56802	3.27061	4.38223	1.18531	3.34318	4.49969	4.49557	4.45777	4.49969	4.29311	1.48163	3.57993	1.66014	3.48183	3.58883	2.34331	4.49969	4.01678	2.1413	2.29849	1.97353	1.08617	1.45959	2.283	4.22548	3.18852	2.38982	-0.429073	4.4966	4.49969	4.49969	3.78763	3.56606	2.30906	3.32388	4.05199	0.19791
A-172	2.99444	4.49969	-0.142747	3.39398	2.53627	4.49969	1.95798	2.15745	3.19424	2.09808	1.52745	0.970258	2.22438	3.22071	3.99594	0.665827	3.5665	4.49969	4.37347	4.16352	4.49969	4.49969	1.009	3.55835	2.78231	4.20077	3.22991	2.87417	4.49969	4.49969	1.83404	2.08225	1.90949	1.05131	0.522476	1.98445	4.49969	3.57703	2.11054	-0.070306	4.33004	4.49969	4.49969	4.49969	4.04455	1.69887	2.84286	4.15037	0.923261
A-204	3.15153	4.49969	0.7265	3.56911	1.67177	2.43396	1.64639	2.52995	1.20412	1.58079	2.45161	1.15592	1.64148	2.64256	3.98082	3.32073	3.75487	4.49969	2.2707	1.91116	4.04517		1.19904	3.44484	2.80109	4.07782	3.39119	1.87925	3.06608	4.49969	1.96507	1.59278	1.50421	0.981125	1.14995	2.25286	2.30096	2.87674	1.53204	-0.0542355	4.27071	4.49969		3.71237	2.81506	4.07648	2.05226	4.07942	0.752507
A375	3.56362	4.49969	0.793083	3.33394	2.6294	4.49969	1.72378	2.50568	3.75235	2.28053	3.4637	1.00596	1.68445	3.0062	4.19144	1.11918	3.30141	4.49969	4.21812	4.49969	4.49969	4.44973	1.18273	3.17032	1.7363	3.58915	3.03142	2.09034	1.3503	4.03809	1.87175	2.10926	1.26393	0.782117	0.662391	1.56226	4.11234	3.51092	1.67346	-0.620126	4.49969	4.49969	4.49969	3.70295	2.5992	4.27212	3.07713	4.08028	0.334494
A388		4.1938		1.19504		4.49969				2.25841	3.78119		1.75443		4.26869			4.49969	3.37408		4.49969					3.88243			4.49969	4.49969		2.28384			0.73531	2.17799	3.95812		2.38766		4.38229		4.49969
A-427	3.25988	4.49969	1.11657	3.31669	2.52464		1.51301	2.3885	3.28724	1.79393	3.44256	1.47627	1.44548	3.04207	3.99477	1.03235	3.36572	4.49969	3.7352	4.15418	4.29914	4.49969	1.56635	3.56424	1.8189	4.02103	2.82714	1.27072	3.22131	3.78413	2.53308	1.73302	1.50844	0.972766	0.372313	1.61714	3.58745	3.32763	0.853388	-0.128259	4.01972	4.49969		4.49969	2.53981	1.97524	2.88348	4.03694	0.197578
A-498	3.22958	4.46629	1.08171	3.3651	2.26769	4.49969	1.60566	2.75105	3.50616	1.70062	3.48609	1.72544	1.54467	3.08644	4.03433	0.774434	3.17981	4.49969	4.2122	4.3819	4.11288	4.49969	1.44615	3.56936	1.25951	3.96818	3.35029	1.87631	2.86786	4.49969	1.79288	2.45621	1.89838	1.06227	1.39899	1.94336	3.04483	2.91118	1.35962	-0.620198	4.3905	4.49969		3.69671	3.0036	3.09326	3.09473	3.84302	0.486728
A-549	3.07198	4.49969	0.972496	3.53763	2.2745	2.5173	1.76003	2.5131	3.40071	1.93431	3.8476	1.29753	1.64057	3.12262	4.22691	0.957959	3.3764	4.49969	3.91938	4.26623	4.49969	3.99808	1.56086	3.49344	2.61083	3.84635	3.07214	1.90918	4.49969	4.49969	1.83758	1.85954	1.65463	1.13646	0.275328	1.90873	3.77167	2.83276	1.48837	-0.455809	4.49969	4.49969	4.49969	3.38313	2.93378	2.8643	2.86022	4.09882	0.956421
A-704		4.33801		3.75905		4.49969				2.09462	3.93593		2.30438		4.49969			4.49969	4.49969		4.49969	4.49969				4.21786			3.01201	4.49969		1.66652			2.47101	2.80165	4.49969		3.00897		4.49969		4.49969
ACHN	3.38909	4.49969	0.941696	1.11822	2.1554	4.49969	3.15907	3.04549	3.59372	2.18878	3.49708	1.74264	1.7749	2.93895	4.12166	0.978919	2.90764	4.49969	4.01223	4.32074	4.02736	4.15604	1.69725	3.63881	1.33907	3.79429	3.34941	1.81262	2.85773	4.12816	2.03481	1.88171	1.69104	1.17317	1.64543	2.05787	3.68671	2.93253	2.16904	-0.683537	4.37733	4.49969	4.49969	3.13562	3.06881	4.17889	2.59767	3.56894	-0.150369
AN3 CA	3.86595	4.49969	0.814385	3.58508	1.90235	4.49969	1.8657	1.90542	2.7986	2.12432	1.93523	1.01784	1.31624	2.82394	4.06463	1.09913	3.9039	4.49969	2.38668	3.78004	4.18161		1.19671	3.61211	2.17659	4.15275	3.23479	1.84938	3.53271	4.49969	1.71824	2.9768	1.98237	0.775167	0.322536	2.20664	3.43644	2.93971	2.24904	-0.531174	4.49061	4.49969	4.49969	3.63237	3.50184	2.01749	2.54756	4.17872	0.57929
AsPC-1		4.25456		2.58342		4.49969				2.41361	3.80059		1.72636		4.49969			4.49969	3.52777		4.49969	4.49969				3.86622			4.42469	4.05971		4.49969			1.20225	2.91591	4.24989		2.87762		4.49969		4.49969
AU-565	3.00294	4.49969	1.55051	1.5389	2.10407	1.45646	4.3855	2.4611	3.84665	2.1249	3.64364	0.557286	1.16826	2.89174	3.95245	1.25122	3.60569	4.49969	3.46607	4.30338	4.2805		0.806135	3.45031	2.13132	3.59607	3.89177	2.40463	3.08448	4.43043	2.12586	3.5879	1.7106	0.709533	0.745322	2.15421	3.63457	2.93928	2.11586	-0.0275887	4.20615	4.49969	4.49969	3.43811	2.99711	4.4357	2.59274	2.91368	0.746267
BT-20	3.8019	4.49969	1.72702	3.62079	2.549	4.49969	1.5932	2.50062	4.06643	2.19026	3.98698	1.26909	2.35145	3.22988	4.27215	1.80541	3.95411	4.49969	3.51161	4.49969	4.49969	4.49969	2.11017	3.66219	3.06612	4.13559	4.10516	4.14163	4.49969	4.49969	2.12304	2.22811	2.27048	1.21701	0.59072	2.28548	4.40809	3.65065	2.32326	0.436076	4.49969	4.49969	4.49969	4.49969	3.86827	0.835794	3.32627	4.49969	1.57159
BT-549	3.26794	4.49969	1.10707	3.14037	2.69887	4.49969	2.86833	2.49836	3.70916	2.06587	3.465	1.48774	1.2178	3.20381	3.89313	2.3885	3.69354	4.49969	3.8823	4.48164	4.2293	4.40349	1.65822	3.73206	1.94126	3.71064	3.68942	2.18646	2.99569	3.98735	2.10094	1.90762	1.96424	1.00425	0.0855449	1.93218	2.32565	3.08267	1.40523	-0.442347	4.16918	4.49969	4.44605	3.44089	3.07126	1.7655	3.07964	4.20027	0.783647
BxPC-3	3.71444	3.92745	0.328969	3.736	2.44164		2.32644	2.47111	3.90188	4.4997	3.5484	1.29842	1.76686	3.10657	4.33207	1.45035	3.43838	4.49969	3.92508	4.38135	4.45562	4.37846	1.49173	3.13451	1.50094	3.70482	3.14291	2.51678	2.88386	3.58472	2.06755	2.1879	2.229	0.998256	0.789765	2.60083	4.0846	3.16618	2.64857	-0.0728222	4.25331	4.49969		3.62374	4.02951	4.49969	2.90232	3.64836	0.643068
C-33 A	3.66357	4.49969	0.619265	1.40708	2.50729	4.49969	3.08655	2.56409	3.94558	1.90659	3.887	1.34464	1.67454	3.19573	4.2468	1.13035	2.03284	4.49969	4.49969	4.29489	4.49969	3.99124	1.3845	3.64692	1.97639	3.60432	3.4828	1.7978	4.49969	4.49969	1.89552	1.26117	1.36474	0.946246	0.306995	1.40582	3.87984	3.04455	1.26264	0.0216182	4.33638	4.49969	4.49969	2.93698	2.5753	1.30317	2.83317	2.78853	0.182301
CAL 27	3.60928	4.0512	0.558533	0.851282	2.71571	1.06837	2.42745	2.15648	3.51701	2.18458	3.62408	1.05856	1.69374	3.0838	4.13983	0.789112	3.22723	4.49969	3.92521	4.36914	3.8497	4.01222	1.13094	3.37826	2.83245	5.49969	3.26136	2.71122	4.49969	3.85308	2.24175	2.05744	1.43164	1.03168	-0.0856738	1.28335	3.96345	3.17002	1.25272	-0.613268	4.49969	4.49969	4.49969	2.40828	2.7199	3.42974	3.19277	1.7503	0.59037
CCRF-CEM	4.17943	3.03993	1.20353	2.95431	2.47129	4.49969	1.52493	2.47995	3.20409	2.1942	3.63578	1.19076	1.35301	3.11689	4.1327	1.02019	3.55039	4.49361	3.43956	4.28983	4.02463	4.02002	0.815765	3.57629	1.79411	3.28931	2.75385	0.649724	3.96964	3.22657	2.26937	3.95441	1.15311	0.889071	0.972147	1.47406	2.70301	2.50857	1.39469	0.137375	4.22244	4.49969	4.03971	4.49969	2.02612	3.15241	3.20042	4.07433	0.570432
COLO 205		4.26064		3.57764		4.49969				2.57981	3.91303		1.43856		4.0862			4.49969	4.3179			4.30603				3.5131			1.29703	4.49969		3.7789			0.657153	1.87261	4.24064		1.55499		4.40474		4.49969
COLO 829		4.42895		3.97264		4.49969				2.43193	4.06492		2.34697		4.19005			4.49969	4.49969		4.49969	3.95949				3.36625			1.85415	3.84638		4.49969			1.21216	2.58865	4.49969		2.47425		4.33703		4.49969
Daoy		4.49969		3.56474		4.49969				2.30076	3.99364		1.45989		4.09976			4.49969	4.06594		4.48272	3.79717				3.06812			3.17211	3.02588		2.35724			0.556685	1.75976	3.60844		1.78367		4.49969		3.43863
DLD-1	3.01357	4.49969	1.46764	3.43055	2.68755	4.49969	4.39844	3.36981	3.90334	2.58947	3.6051	1.80843	1.59725	3.19601	4.26958	1.27412	3.35146	4.49969	4.21861	4.35666	4.49969	4.49969	1.70102	3.60062	2.60245	3.93486	3.47701	2.12353	3.06096	3.9899	2.14874	3.61165	2.22928	1.28035	1.85234	2.67816	4.31079	2.8725	2.86262	-0.28087	4.49969	4.49969	4.49969	3.58811	3.75127	2.69422	3.12934	3.89274	0.86967
DoTc2 4510		4.48135		0.957471		4.49969				2.99189	3.87888		1.68797		2.69451			4.49969	3.62834		4.49969	4.49969				3.86905			4.49969	3.49004		2.02761			0.679419	2.07952	3.78574		2.08789		4.2984		4.49969
DU 145		4.49969		1.21313		3.28268				2.32287	3.75146		1.43646		4.41949			4.49969	4.26275		4.10484	4.04976				3.82741			3.18479	3.66651		2.33281			0.597605	1.75032	3.32056		1.60548		4.48059		4.49969
FaDu	3.05217	4.42019	0.659756	0.614875	2.66009		1.92793	2.50993	4.00151	2.15825	3.54148	1.43353	1.33031	3.21007	4.08125	1.32143	3.28627	4.49969	4.08749	4.49969	4.49969	4.48102	1.47758	3.62891	1.81972	3.84053	3.72763	2.56048	3.3931	3.93984	2.27073	2.16553	1.67603	0.935566	-0.0338153	1.4631	3.81751	3.02569	1.39756	-0.451223	4.24845	4.49969	3.98133	3.0638	3.12939	3.0671	2.98924	1.79586	0.823138
HCT 116	3.10226	4.24742	0.15298	3.29486	2.50571	4.49969	1.70482	2.07069	3.3603	2.48706	3.58851	1.04347	1.72075	3.07234	4.11116	2.3443	3.46189	4.49969	2.90184	4.32067	4.49969	4.49969	0.898817	3.52522	2.34486	3.79316	3.22812	2.04867	3.00179	4.27027	2.43334	4.49969	1.48523	0.677598	0.230884	1.73548	4.15404	2.81151	1.6327	-0.288851	4.44999	4.49969	4.49969	3.90927	2.81834	4.28174	3.04329	4.13492	0.569436
HCT-15	3.26472	4.49969	1.67459	3.13874	2.34307	4.49969	3.60322	3.45931	3.8467	2.27218	3.51637	2.10624	1.51647	3.05611	4.19167	1.49213	3.31215	4.49969	3.76385	4.3414	4.49969	4.49969	1.99208	3.48374	2.18636	3.69198	3.6848	2.09269	3.22348	3.84304	1.91009	2.65307	2.20496	1.39739	1.92099	2.30289	3.87743	3.18529	4.4997	-0.498185	4.32693	4.49969	4.49969	3.80009	3.19451	2.46602	3.03127	3.98272	0.500606
Hs 578T	3.90031	3.72406	1.4828	3.44717	2.47863	1.51891	1.60482	2.18323	3.51285	2.19834	3.61257	1.27055	1.51958	3.12397	4.36754	0.72243	3.56043	4.49969	4.06815	4.38349			1.53093	3.67743	1.49334	3.17449	3.43896	1.5956	4.49969	4.49969	1.95166	1.97629	1.87778	1.21864	0.280946	1.99442	3.67051	3.45665	1.2024	-0.192972	4.48939	4.49969	4.49969	3.85232	3.60165	1.68629	2.98532	4.09999	0.631775
J82	4.49969	4.49969	1.32917	3.66649	2.49788	1.98527	4.49969	2.96395	4.14258	2.16453	3.72473	2.25172	1.60988	3.1544	4.46497	1.05029	3.64987	4.49969	4.31692	4.35999	3.99843	4.34125	1.48299	3.59133	2.27348	3.5154	3.71852	2.56269	4.49969	3.88835	2.04413	1.96933	1.92806	1.06942	1.53823	2.37021	4.12701	3.62321	2.52006	-0.280583	4.46978	4.49969	4.49969	3.65676	3.69392	2.63604	2.95923	4.18678	0.983999
Jurkat E6-1	3.52414	3.60234	0.681708	3.26331	2.76255	4.49969	3.18977	2.30114	3.3865	2.67022	3.51618	0.957285	1.70221	2.98387	3.60663	1.24499	2.66856	4.49969	4.04779	4.06235	4.33553	3.63964	0.573872	3.3465	1.7366	2.98943	3.04517	0.847108	3.03284	3.67762	2.22088	3.49619	1.03984	0.736873	0.650644	1.77896	3.61349	2.34456	1.77982	-0.216949	4.10221	4.49969	4.49969	4.35414	2.3802	1.79938	3.20041	3.92876	0.52008
K-562	3.74256	4.42305	0.430131	3.58986	2.77234		1.47554	2.6331	2.61407	2.62954	3.50773	0.883668	1.63722	3.04337	4.05876	1.21306	1.13238	4.49969	4.49969	3.59595	4.49969		1.44208	3.58767	1.78654	3.89515	2.40187	1.65304	4.20032	3.06619	2.2628	-0.277757	1.50667	0.994809	0.670414	2.037	4.39362	2.96516	1.43648	-0.256288	4.13842	4.49969	4.49969	3.84816	3.0562	4.49969	3.18448	4.07942	0.883913
KU812		3.74284		3.53976		4.10794				2.14698	3.71651		1.42705		3.22489			4.49969	4.49969		4.49969	3.92581				3.41604			3.98604	3.42371		-0.318017			1.14904	1.95072	4.302		1.86592		4.42206		2.89121
LNCaP FGC		4.01565		3.913		4.49969				2.29384	4.09598		1.79735		4.41402			4.49969	4.49969		3.2809	4.49969				4.20957			4.49969	4.49969		4.49969			0.871658	2.4794	1.9363		2.48712		3.91595
LoVo	3.50509	4.49969	1.04877	0.927028	2.23771	4.49969	1.15197	2.57792	3.24	1.66005	3.43171	1.12721	1.50351	2.93265	4.31781	0.787325	2.90888	4.49969	4.14126	3.88243	2.54161	4.28947	1.07123	3.17942	1.22098	3.82811	2.81853	1.98869	3.20698	3.7236	1.81383	3.39845	1.06056	0.964704	0.690544	1.8138	2.06852	2.51062	1.72955	-0.290577	4.17587	4.49969	4.42329	3.35068	2.86888	4.49969	3.03641	3.63062	0.466001
LS 174T	3.68151	4.49969	0.372119	3.22059	2.52569	4.49969	1.44914	2.24357	3.56256	2.44055	3.50494	1.4731	1.60405	3.14995	4.02193	1.00278	3.07193	4.49969	3.66697	4.49969		3.36674	1.55314	3.4114	0.919803	3.26859	2.9253	1.88653	4.49969	3.77793	2.35967	3.61704	1.3193	0.887236	0.396936	1.40616	4.19664	2.64782	1.45448	-0.461391	4.39998	4.49969	3.45169	3.51456	2.33952	4.49969	3.11755	4.07673	-0.12077
MCF7		4.49969		4.03983		4.49969				1.85183	4.20948		1.76038		4.49969			4.49969	2.9054		4.39151	4.49969				4.19778			4.49969	4.49969		4.49969			0.691758	2.56972	3.67695		2.61278		4.35881		4.49969
MeWo	3.63089	4.49969	1.64125	3.63676	2.52894	4.49969	4.49969	2.50371	4.14159	2.15689	3.64899	1.40887	1.82301	3.14169	4.15772	1.0324	3.74844	4.49969	4.49969	4.47356	3.62599	4.49969	1.49258	3.41832	1.36613	4.27867	3.53154	2.73375	3.10878	4.49969	2.15076	4.49969	2.22816	0.897818	0.558194	2.60777	3.69877	3.43339	2.49584	0.0614626	4.49969	4.49969	4.49969	3.95538	3.71891	4.49969	3.19272	4.14737	0.482469
MG-63	3.48083	4.49969	0.714738	3.56624	2.33705	2.3612	1.99928	2.596	3.6096	2.19917	3.78271	1.10359	1.91209	2.977	3.91223	0.754101	3.62386	4.49969	3.73722	4.19434	4.28773	4.08111	0.955039	3.32215	1.96422	3.65386	3.23755	2.19177	4.49969	4.2029	1.86012	1.74348	1.73689	1.02202	0.322594	2.0326	3.68411	3.1358	1.82296	-0.579871	4.49969	4.49969	3.20756	4.1249	3.32148	2.65647	3.04419	4.18529	0.710223
MIA PaCa-2		4.49969		3.60232		3.24504				2.78805	3.78954		1.58506		4.26838			4.49969	4.19604		4.49969					4.03026			3.83614	4.49969		1.54652			0.840222	1.85136	4.34028		1.79702		4.49969		4.49969
MOLT-4	3.31625	3.46339	0.0600411	3.11878	2.25951	4.49969	1.18607	2.47538	2.95417	2.21224	3.54858	0.805842	1.49355	3.07247	3.87682	0.911267	3.11031	4.18825	3.42219	4.08264	4.12509	3.68589	0.50515	3.43476	1.58307	3.15748	2.54067	0.64636	4.49969	3.47197	2.26582	1.19102	0.617129	0.839844	0.210692	1.15508	3.48661	2.61889	1.01608	-0.64524	4.16968	4.49969	4.49969	3.80186	1.75678	2.18452	2.59213	4.04762	0.234863
NCI-H460	3.20041	4.49969	0.438218	3.54107	2.35189	4.49969	1.32737	2.66847	3.39296	1.64023	3.61927	1.41619	1.46158	2.97651	3.95259	1.93038	3.57032	4.43311	2.40908	4.44854	4.49969	3.87193	1.57557	3.41598	1.91666	2.93769	3.06029	1.53203	3.02899	4.49969	2.04322	4.49969	1.29704	1.07368	0.269589	1.31185	3.79048	2.36844	1.40761	-0.620602	4.49969	4.49969	4.49969	3.74289	2.5192	3.59916	2.79562	4.10667	0.511505
NCI-H82	3.28311	4.49969	0.671488	3.4275	2.81342	3.35272	1.26891	2.35711	3.19908	2.5228	3.60226	0.90887	1.45151	2.80354	4.09973	1.45224	3.54421	4.49969	3.92932	4.22628	4.49969	4.34917	0.990885	3.16535	1.99231	3.48687	2.93125	1.59624	2.93643	3.80775	2.41233	3.92471	1.57801	0.779116	0.411234	2.00433	4.29302	2.50243	1.96015	-0.624845	4.35814	4.49969	3.27229	4.30242	3.00374	3.67922	2.90254	3.9319	0.482237
OVCAR-3	3.53946	4.49969	1.4196	3.21078	2.02036	4.49969	2.08102	2.48832	4.26465	1.85569	3.98799	1.05345	1.77508	3.05496	4.20628	1.89854	3.4812	4.49969	3.81016	4.49969	3.8312		1.37374	3.56684	1.87424	4.05248	3.65903	2.15657	3.06672	4.14252	2.49455	1.8859	2.33818	0.983751	0.71732	2.64726	3.04864	3.52122	2.61411	-0.072046	4.36278	4.49969	4.49969	3.73717	4.35024	2.67314	2.70656	4.22369	2.49969
PA-1	2.91085	4.49969	-0.185578	3.47931	2.7383	4.39079	1.22125	2.10098	3.11028	2.24282	3.57717	1.05653	1.47235	3.11325	3.87079	0.675354	3.09879	4.43292	4.14396	4.24999	4.49969	3.38271	0.744077	3.03155	1.98622	2.62966	2.94856	1.52883	3.2077	4.49969	1.93757	1.71783	0.822697	0.600808	0.286704	0.979345	4.22989	2.24966	0.944426	-0.401466		4.49969	4.49969	3.60959	1.91799	3.52477	3.1819	3.85633	0.738051
RKO		4.49969		3.64928		3.51714				2.40396	3.83766		1.46664		4.04392			4.49969	3.75538		4.57621					4.20752			1.61685	4.49969		2.80723			0.735324	1.9801	3.8374		1.99836		4.38206		4.49969
RPMI-7951	3.08667	4.42815	0.730277	3.61933	2.66706	4.49969	1.99753	2.16886	3.64059	2.28433	3.72436	1.24734	1.70795	3.17158	4.3468	0.837017	3.5089	4.49969	4.03155	4.1745	4.15516	4.1048	1.17978	3.54093	1.61986	3.56885	3.18504	2.33541	2.10582	3.93454	1.81377	1.67837	1.59006	0.8956	0.545131	1.82075	3.3461	2.88704	1.66507	-0.394869		4.49969	4.49969	4.49969	2.84576	0.0782513	3.00969	4.12009	0.15144
RT4		4.22101		2.10087		4.49969				2.63548	1.88171		1.84158		3.54893			4.49969	4.49969		4.49969	4.23955				4.08629			4.49969	4.49969		2.28935			0.945209	2.58335	4.49969		2.75825		4.49969		3.97793
SHP-77	4.35784	4.12752	2.578	3.62381	3.41064	4.49969	4.49969	3.59676	3.74567	3.00069	3.70385	1.97815	1.73736	3.44093	4.28336	1.81981	4.0602	4.49969	4.49969	4.49969	4.49969		1.9989	3.49923	2.05685	4.15285	3.49341	2.48923	4.01905	4.49969	2.90308	4.49969	3.21284	1.39852	2.09588	4.49969	4.49969	3.06451	3.68821	0.000452265	4.32592	4.49969	4.49969	4.49969	4.49969	4.49969	3.45917	4.13115	1.27087
SJCRH30	3.85782	4.49969	1.12643	3.44799	2.47617		4.20189	2.59409	3.78443	2.61669	3.4329	1.30598	1.82639	3.0397	2.95746	1.43229	3.64273	4.49969	3.34036	4.18208	4.49969	4.49969	1.31015	2.85992	1.78645	4.13649	3.03672	1.77431	4.49969	4.49969	2.5068	2.28351	1.65014	1.06439	0.527491	1.80298	3.8381	2.72304	1.73409	-0.291841	4.41419	4.49969	4.49969	4.49969	3.01174	4.45355	2.91784	4.02139	0.588322
SK-N-AS	3.41184	4.49969	1.55617	3.41349	2.49904	4.49969	1.84927	2.20395	3.61678	2.50363	3.79959	1.08414	1.48548	2.95762	4.17387	0.76447	2.96529	4.49969	2.76743	4.49205	4.49969	4.49969	1.15393	3.30078	0.952456	3.85281	3.11669	1.84421	3.54109	4.0041	2.27073	1.57025	1.85632	0.990276	0.842385	2.14024	4.49969	3.45167	2.088	-0.400209	4.39535	4.49969		3.76661	3.13654	2.47639	3.15892	4.03368	0.448436
SK-N-FI		4.06441		3.53043		4.49969				2.4088	3.64171		1.77869		4.49969			4.49969	3.71388		3.94287	4.49969				4.29892			4.49969	4.49969		4.49969			2.13831	3.05719	4.18009		2.22217		4.49969		4.49969
SNU-C2B		4.49969		1.55146		4.49969				2.79968	3.72587		1.53995		4.25672			4.49969	4.49969			4.49969				4.16911			4.49969	4.49969		2.58732			1.29099	3.09738	4.49286		3.02336		4.47567		4.49969
SR	2.73682	3.24726	-0.0598437	3.01275	2.3957	4.49969	2.22028	1.57223	2.77337	2.14968	3.31384	0.82206	1.10501	2.6377	3.75813	1.08286	2.99265	4.27338	3.58653	4.38945	4.2866	3.58901	1.03011	1.92254	1.44948	2.9986	1.64474	1.72751	3.33878	3.35972	2.0383	3.6638	0.807801	0.372677	0.6184	1.1199	3.68893	1.716	0.792067	-0.476701	3.86224	4.13684	4.43054	3.6262	1.66765	2.03878	3.1038	3.93655	0.338536
SUP-T1		4.33467		3.66483		4.49969				2.54013	3.93279		1.40232		3.82778			4.49969	3.28075		4.11899	4.49969				3.89724			4.49969	3.94756		3.66853			1.14968	2.01614	4.30166		1.90221		4.39521		4.49969
SW48	3.27008	4.00074	0.223775	0.477121	2.23669	4.49969	0.608549	2.30014	3.47655	2.12421	3.6567	1.06506	1.3661	3.03828	4.34756	0.982263	4.06829	4.00793	3.14939	4.09801	4.45113	4.32129	1.51774	2.90208	1.82574	3.58654	3.29273	1.75704	4.49969	4.0468	2.70972	2.16353	1.87663	0.798576	0.0696928	1.01195	3.66316	3.65285	0.971847	0.0747404	4.48877	4.49969	4.49969	4.49969	2.3122	4.27358	2.52751	4.49969	1.09471
SW480	3.23727	4.44823	0.682489	3.67748	2.88946	4.49969	4.49969	2.88402	3.79976	2.60733	3.71448	1.60017	1.73318	3.26626	3.9066	0.499687	4.02225	4.49969	4.03833	4.21016	4.49969	4.49969	1.12601	3.2669	2.66832	3.93262	3.55718	2.53112	3.47499	3.93196	2.17319	3.55912	2.49263	0.898912	0.691892	2.2244	4.42864	3.11344	2.26211	0.303874	4.48969	4.49969	4.49969	4.49969	3.66736	4.16925	3.10516	4.19903	0.721027
SW620	3.62325	4.49969	0.435825	3.49584	2.65149	4.49969	0.884318	2.99964	3.42023	2.75591	3.6275	0.848585	1.51097	3.08738	4.05498	0.606124	4.02451	4.49969	3.86531	3.79499	3.90382	4.49969	0.811681	3.04195	2.30371	3.69397	3.12463	1.36698	4.49969	4.05951	2.36755	4.49969	2.30275	0.869101	0.620626	1.77946	4.3539	3.42521	1.62586	-0.167068	4.49969	4.49969	4.49969	3.8069	3.62083	4.22202	3.08049	4.39922	0.725799
SW948		4.3257		3.56892		4.49969				2.28505	3.65917		1.60608		4.49969			4.49969	3.66647		4.12465	3.96754				4.0798			4.49969	3.97235		4.49969			0.733453	2.48412	4.19948		1.86152		4.4157
T24		4.49969		3.64553		4.49969				2.21438	3.74057		1.5555		4.33108			4.49969	4.43792		4.49969	4.07627				3.3606			3.12238	3.55522		3.0052			0.894802	2.22165	4.09984		2.40196		4.49969		3.52913
T98G		4.1065		3.79571		1.86977				2.36995	3.8212		1.66734		4.09818			4.49969	3.88272		2.97384	4.49969				3.85546			4.49969	4.1362		1.8613			0.62125	2.71637	3.56564		2.5328		4.49969		4.49969
TT		4.24901		3.66193		4.49969				2.75429	3.77838		1.98172		4.49969			4.49969	4.34492							4.49969			4.49969	4.49969		4.49969				1.86856	4.49969		2.16944		4.47746
U-2 OS	3.3914	4.04018	1.31679	3.55369	2.2438	4.49969	2.03228	2.79526	3.75817	2.45879	3.64877	1.89939	1.74214	3.06408	4.08919	1.72579	3.41854	4.49969	4.1572	4.28568	4.49969		1.6853	3.49023	1.5967	3.92746	3.29717	2.38539	3.92976	4.49969	2.0066	3.68687	1.98891	1.02129	1.17662	2.55237	3.97894	2.22429	2.73147	-0.515092	4.40594	4.49969	4.50412	4.49969	3.52273	3.62857	2.71223	3.99914	0.952737
U-87 MG	3.39076	4.49969	0.81104	3.74697	2.79862	4.49969	4.49969	2.57099	4.00636	2.54106	3.98309	1.38187	2.23014	3.30542	4.14519	1.00259	3.84223	4.49969	4.46275	4.34831	4.49969	4.25757	1.57851	3.65278	1.80492	3.87037	3.59258	2.4253	4.49969	4.40716	2.20729	4.49969	1.92529	0.977473	0.955109	2.0767	3.72523	3.27656	2.10192	0.705035		4.49969	4.49969	4.49969	4.46808	2.8141	2.90701	4.19886	0.592799
VA-ES-BJ		4.49969		3.55887		4.49969				1.93202	3.92536		1.76172		4.20693			4.49969	3.78824		4.3302	4.13813				3.21205			3.37189	4.04755		1.79829			0.324707	1.70336	3.46603		1.71652		4.49969		4.49969
[truncated: 73 more columns]

## Sheet: S3B_reproducibility
Table S3B. IC50s of replicate experiments (original), and after reinterpretation using similar curve-fitting rules IC50s (reinterpreted, in nM)
1: numbers on this row indicate Pearson correlations between replicate profiles
compound	AZD-8055				afatinib				carboplatin				cisplatin				dabrafenib				dasatinib				docetaxel (not changed after reinterpretation)				ICG-001				irinotecan				MPI-0479605				olaparib				paclitaxel (data not changed after reinterpretation)				trametinib
correlations1	original	0.75941	reinterpreted	0.832896	original	0.667076	reinterpreted	0.987226	original	0.814964	reinterpreted	0.935847	original	0.914592	reinterpreted	0.934594	original	0.73124	reinterpreted	0.807549	original	0.744514	reinterpreted	0.962599	original	0.872847	reinterpreted	0.872847	original	0.906664	reinterpreted	0.91416	original	0.836898	reinterpreted	0.957611	original	0.584405	reinterpreted	0.785716	original	0.590614	reinterpreted	0.805402	original	0.702967	reinterpreted	0.703577	original
exp. nr.	13OL051	15OL292	13OL051r	15OL292r	13OL098	14OL224	13OL098r	14OL224r	14OL157	15OL293	14OL157r	15OL293r	14OL180	15OL283	14OL180r	15OL283r	13OL074	15OL268	13OL074r	15OL268r	13OL035	15OL269	13OL035	15OL269	13OL042	15OL294	13OL042r	15OL294r	13OL125	14Ol229	13OL125r	14Ol229r	13OL053	15OL237	13OL053r	15OL237r	13OL025	15OL239	13OL025r	15OL239r	13OL081	15OL296	13OL081r	15OL296r	13OL090	15OL290	13OL090r	15OL290r	13OL99
769-P	2.19227	2.3999	2.19227	2.3999	3.34801	3.6015	1.09404	0.715534	3.39612	3.85411	3.39612	3.85411	3.59315	3.60696	3.59315	3.60696	4.03643	2.86281	4.49969	2.86281	1.73661	1.88113	1.43572	1.88113	1.01621	1.23024	1.01621	1.23024	4.18074	3.88085	3.96805	3.88085	4.12452	4.07951	4.12452	4.07951	2.93634	2.83509	2.86345	2.83509	4.49969	4.4811	4.49969	4.4811	1.86484	1.97011	1.86484	1.97011	1.9279
786-O	2.13	2.47897	2.13	2.47897	3.43507	3.56606	3.43507	3.56606	4.23373	4.29311	4.23373	4.29311	3.34302	3.48183	3.34302	3.48183	3.51808	4.49969	3.07232	3.07555	2.55508	2.29849	2.1879	2.29849	1.23453	1.45959	1.23453	1.45959	3.81875	3.86813	3.81875	3.86813	3.35053	3.29528	3.35053	3.29528	2.93161	2.86103	2.92721	2.86103	4.49969	4.49969	4.49969	4.49969	2.12802	2.4608	2.12802	2.4608	4.41168
A-172	1.86149	2.09808	1.86149	2.09808	3.46942	3.39398	3.46942	3.39398	4.49969	4.49969	4.49969	4.49969	4.24569	4.20077	4.24569	4.20077	3.54423	4.49969	3.54423	4.49969	1.99753	2.08225	1.79219	2.08225	0.511745	0.522476	0.511745	0.522476	3.66138	3.59957	3.66138	3.59957	4.13539	4.14634	3.97414	4.14634	2.79781	2.29648	2.73223	2.29648	4.49969	4.38718	4.49969	4.38718	1.21771	1.10239	1.21771	1.10239	2.04288
A-204	1.49109	1.58079	1.49109	1.58079	3.34543	3.56911	3.34543	3.56911	4.49969		4.49969	4.49969	4.04213	4.07782	4.04213	4.07782	3.67121	3.06608	3.1541	3.06608	1.32222	1.59278	1.16986	1.5747	0.492664	1.14995	0.492664	1.14995	3.68355	3.91708	4.07163	4.21204	3.18109	3.18036	3.18109	3.18036	2.60816	2.6507	2.60816	2.6507	4.34375	3.94752	4.34375	4.2095	0.74882	1.57535	0.74882	1.57535	2.80004
A375	1.92956	2.28053	1.92956	2.28053	3.10842	3.33394	3.10842	3.33394	4.49969	4.44973	4.49969	4.44973	3.78376	3.58915	3.78376	3.58915	1.41675	1.3503	1.41675	1.3503	2.71433	2.10926	1.66318	2.10926	0.741763	0.662391	0.741763	0.662391	3.78465	3.71312	3.78465	3.71312	3.65787	3.41132	3.65787	3.41132	2.59974	2.43846	2.59974	2.43846	4.40336	3.96832	4.40336	4.48077	1.59291	1.41381	1.59291	1.41381	1.10197
A-427	2.0078	1.79393	2.0078	1.79393	3.46177	3.31669	3.46177	3.31669	4.49969	4.49969	4.49969	4.49969	4.02644	4.02103	4.02644	4.02103	3.53775	3.22131	3.24355	3.22131	3.33806	1.73302	1.58258	1.73302	0.544086	0.372313	0.544086	0.372313	3.44665	3.26037	3.44665	3.26037	3.5816	3.48006	3.5816	3.48006	2.61335	1.80294	2.16145	1.80294	4.36431	4.36239	4.04422	4.26921	1.3803	0.696413	1.3803	0.696413	1.22021
A-498	1.68489	1.70062	1.68489	1.70062	3.43609	3.3651	3.43609	3.3651	4.49969	4.49969	4.49969	4.49969	3.45484	3.96818	3.94687	3.96818	3.35849	2.86786	2.98535	2.86786	2.83293	2.45621	2.68681	2.45621	1.11366	1.39899	1.11366	1.39899	3.78719	3.73883	3.78719	3.73883	3.75352	3.51761	3.75352	3.51761	2.73402	2.54996	2.73402	2.54996	4.49969	4.49969	4.49969	4.49969	1.74651	2.18339	1.74651	2.18339	4.34774
A-549	2.10474	1.93431	2.10474	1.93431	3.50024	3.53763	3.50024	3.53763	4.49969	3.99808	4.49969	4.49969	3.75749	3.84635	3.75749	3.84635	3.6147	4.49969	3.07542	3.32201	4.00844	1.85954	2.96297	1.71824	0.330862	0.275328	0.330862	0.275328	3.6726	3.63336	3.6726	3.63336	3.87035	3.89491	3.87035	3.89491	2.39236	2.175	2.39236	2.175	4.39931	4.49969	4.39931	4.49969	1.06435	0.872033	1.06435	0.872033	1.75385
ACHN	1.60678	2.18878	1.76419	2.18878	2.4733	1.11822	0.860984	1.11822	4.19395	4.15604	4.19395	4.15604	3.55745	3.79429	3.55745	3.79429	3.06207	2.85773	2.87287	2.85773	1.68185	1.88171	1.48481	1.86521	1.31293	1.64543	1.31293	1.64543	4.26954	3.99818	4.26954	3.99818	3.5301	3.54683	3.5301	3.54683	2.60235	2.67356	2.60235	2.67356	4.42911	4.49969	4.42911	4.49969	1.97639	2.40755	1.97639	2.40755	2.69515
AN3 CA	1.76981	2.12432	1.76981	2.12432	3.44423	3.58508	3.44423	3.58508	4.49969		4.49969	4.49969	3.94806	4.15275	3.94806	4.15275	4.49969	3.53271	3.43377	3.53271	3.55012	2.9768	3.10014	2.9768	-0.0447373	0.322536	-0.0447373	0.322536	3.83072	3.92198	3.83072	3.92198	4.19476	2.57573	2.6271	2.57573	2.50241	2.43917	2.50647	2.43917	4.49969	4.49969	3.83647	4.49969	0.553544	0.9162	0.553544	0.948863	4.13295
AU-565	1.70601	2.1249	1.70601	2.1249	1.10608	1.5389	1.10608	1.49053	4.26801		4.26801	4.32488	3.55456	3.59607	3.55456	3.59607	3.77197	3.08448	2.66853	3.08448	3.84944	3.5879	3.84944	3.5879	0.346841	0.745322	0.346841	0.745322	3.3758	3.47559	3.3758	3.47559	3.24044	3.28484	3.24044	3.28484	3.79099	2.52932	2.30304	2.52932	4.4681	4.2358	4.4681	4.2358	0.612901	1.22618	0.612901	1.22618	4.28728
BT-20	2.0483	2.19026	2.0483	2.19026	3.6385	3.62079	3.6385	3.62079	4.49969	4.49969	4.49969	4.49969	4.15932	4.13559	4.15932	4.13559	4.49969	4.49969	4.49969	4.49969	3.99131	2.22811	1.8836	2.22811	0.937198	0.59072	0.937198	0.59072	4.08031	3.91719	4.08031	3.91719	4.28966	4.39308	4.07519	4.39308	2.78919	2.60694	2.78919	2.60694	4.49969	4.49969	4.21929	4.49969	1.68754	1.09261	1.68754	1.09261	4.49969
BT-549	1.70694	2.06587	1.86681	2.06587	3.51405	3.14037	3.51405	3.14037	4.43317	4.40349	4.43317	4.40349	3.69574	3.71064	3.69574	3.71064	3.7581	2.99569	3.0184	2.99569	2.15668	1.90762	2.04943	1.90762	0.454162	0.0855449	0.454162	0.0855449	3.49498	3.28884	3.4854	3.28884	3.33658	3.47841	3.33658	3.47841	3.06951	2.45442	3.01683	2.45442	4.49969	4.49969	4.48908	4.49969	1.57473	0.651964	1.57473	0.651964	4.24785
BxPC-3	2.04327	2.50099	2.04327	2.50099	3.56698	3.736	3.56698	3.736	4.49969	4.37846	4.49969	4.37846	3.63542	3.70482	3.63542	3.70482	3.42761	2.88386	3.06536	2.88386	2.30992	2.1879	1.98914	2.1879	0.525212	0.789765	0.525212	0.789765	3.48865	3.57722	3.47832	3.57722	3.55011	3.63981	3.55011	3.63981	3.22089	2.71276	2.32118	2.71276	4.49969	4.49969	4.49969	4.49969	0.934289	1.37466	0.934289	1.37466	1.46568
C-33 A	1.91657	1.90659	1.91657	1.90659	1.33045	1.40708	1.33045	1.40708	4.34703	3.99124	4.34703	4.25959	3.44579	3.60432	3.44579	3.60432	3.51951	4.49969	4.49969	4.49969	0.950714	1.26117	0.781038	1.26117	0.455314	0.306995	0.455314	0.306995	3.44352	3.36174	3.44178	3.36174	3.08966	2.903	3.08966	2.903	2.48304	2.38512	2.48304	2.38512	3.83418	3.80881	3.83418	3.80881	0.98328	0.880876	0.98328	0.880876	0.913444
CAL 27	2.20194	2.18458	2.20194	2.18458	2.63736	0.851282	0.975978	0.851282	4.49969	4.01222	4.49969	4.34972	3.62855	3.50006	3.62855	3.50006	4.48859	4.49969	4.48859	4.49969	2.18443	2.05744	2.14403	2.05744	0.215652	-0.0856738	0.215652	-0.0856738	3.64745	3.49907	3.64745	3.49907	3.29929	3.1601	3.29929	3.1601	2.57554	2.33655	2.57862	2.33655	4.24015	4.22166	4.24015	4.22166	0.814091	0.654436	0.814091	0.654436	1.76275
CCRF-CEM	1.91489	2.1942	1.91489	2.1942	3.10682	2.95431	3.10682	2.95431	4.01816	4.02002	4.01816	4.02002	3.37714	3.28931	3.37714	3.28931	4.49969	3.96964	3.82387	3.96964	3.85673	3.95441	3.99512	3.95441	0.809511	0.972147	0.809511	0.972147	3.68384	3.48661	3.68384	3.48661	2.40969	2.34119	2.40969	2.34119	2.68331	2.68016	2.68331	2.68016	3.7572	3.75301	3.7572	3.75301	2.00373	1.58736	2.00373	1.58736	4.44749
DLD-1	2.20747	2.58947	2.20747	2.58947	3.23366	3.43055	3.23366	3.43055	4.49969	4.49969	4.49969	4.49969	4.1203	3.93486	4.1203	3.93486	3.59303	3.06096	3.01553	3.06096	3.53178	3.61165	3.53178	3.61165	1.36389	1.85234	1.36389	1.85234	4.08491	4.18535	4.08491	4.18535	3.90297	3.86002	3.90297	3.86002	2.6137	2.44908	2.6137	2.44908	4.49969	4.26647	4.10468	4.26647	2.27332	2.55755	2.27332	2.55755	2.69254
FaDu	2.17956	2.15825	2.17956	2.15825	0.533943	0.614875	0.79094	0.614875	4.49969	4.48102	4.49969	4.48102	3.7595	3.84053	3.7595	3.84053	3.64184	3.3931	3.11415	3.3931	2.64933	2.16553	1.84124	2.16553	0.0730581	-0.0338153	0.0730581	-0.0338153	3.77812	3.60418	3.77812	3.60418	3.01227	2.99698	3.01227	2.99698	2.68877	2.47154	2.68877	2.47154	4.49969	3.83429	3.9846	3.83429	1.13332	0.766125	1.13332	0.766125	1.13322
HCT 116	2.24192	2.48706	2.24192	2.48706	2.97063	3.29486	2.97063	3.29486	4.49969	4.49969	4.49969	4.49969	3.78844	3.79316	3.78844	3.79316	2.92943	3.00179	2.92943	3.00179	4.15369	4	4	4	0.319423	0.230884	0.319423	0.230884	3.36427	3.34431	3.36427	3.34431	3.28767	3.04043	3.28767	3.04043	2.42358	2.36937	2.42358	2.36937	4.49969	3.70633	4.49969	3.70633	0.67827	0.750043	0.67827	0.750043	1.5394
HCT-15	1.93034	2.27218	1.93034	2.27218	3.19015	3.13874	3.19015	3.13874	4.49969	4.49969	4.49969	4.49969	3.8712	3.69198	3.8712	3.69198	3.52283	3.22348	3.20576	3.22348	3.22427	2.65307	2.54796	2.65307	1.76369	1.92099	1.76369	1.92099	4.25353	4.19532	4.25353	4.19532	3.65797	3.71913	3.65797	3.71913	2.53597	2.52011	2.53597	2.52011	4.49969	4.49969	4.49969	4.49969	2.47014	2.45262	2.47014	2.45262	3.30982
Hs 578T	1.90002	2.19834	1.90002	2.19834	3.52893	3.44717	3.52893	3.44717	4.49969		4.49969	4.49969	2.92827	3.17449	2.92827	3.17449	4.06224	4.49969	2.41958	3.2634	1.89676	1.97629	1.86838	1.97629	0.329369	0.280946	0.329369	0.280946	3.48485	3.28366	3.48485	3.28366	3.95677	4.05553	3.95677	4.05553	2.50088	2.44868	2.49291	2.44868	4.49969	3.86231	4.49969	4.49969	1.71274	0.817607	1.71274	0.817607	2.5689
J82	1.93336	2.16453	1.93336	2.16453	3.52352	3.66649	3.52352	3.66649	4.49969	4.34125	4.49969	4.34125	3.54248	3.5154	3.54248	3.5154	4.49969	4.49969	4.49969	4.49969	3.39759	1.96933	2.21396	1.87402	1.18246	1.53823	1.18246	1.53823	3.86155	3.87788	3.86155	3.87788	3.64622	3.73157	3.64622	3.73157	2.78974	2.89601	2.78974	2.89601	4.49969	4.49969	4.49969	4.49969	1.28021	2.3714	1.28021	2.3714	4.49969
Jurkat E6-1	1.94856	2.67022	2.07169	2.42261	2.93956	3.26331	2.93956	3.26331	3.49575	3.63964	3.49575	3.63964	2.88462	2.98943	2.88462	2.98943	3.49422	3.03284	3.30183	3.04331	3.37783	3.49619	3.37783	3.49619	0.322043	0.650644	0.322043	0.650644	3.60701	3.8669	3.60701	3.8669	2.24872	2.79932	2.24872	2.79932	2.13523	2.38408	2.13523	2.38408	3.19093	3.76255	3.19093	3.76255	0.659522	1.17292	0.659522	1.17292	4.49969
K-562	2.27699	2.62954	2.27699	2.62954	3.51396	3.58986	3.51396	3.58986	4.49969		4.49969	4.49969	3.99636	3.89515	3.99636	3.89515	4.13152	4.20032	4.13152	4.20032	0.499687	-0.277757	-0.33189	-0.277757	0.427745	0.670414	0.427745	0.670414	3.46647	3.45904	3.45423	3.45904	3.52183	3.43648	3.52183	3.43648	2.91959	2.90642	2.91032	2.90642	4.49969	4.49969	4.49969	4.49969	0.777822	1.19626	0.777822	1.19626	1.56732
LoVo	1.45363	1.66005	1.45363	1.66005	3.3153	0.927028	3.3153	3.38644	4.49969	4.28947	4.49969	4.28947	3.88837	3.82811	3.88837	3.82811	3.26917	3.20698	3.00456	3.20698	3.19756	3.39845	3.1975	3.39845	0.918606	0.690544	0.918606	0.690544	3.47374	3.39246	3.47374	3.39246	3.87984	3.66163	3.87984	3.66163	2.45762	2.34162	2.42183	2.34162	4.49969	3.93373	4.49969	4.49969	1.35602	1.27095	1.35602	1.27095	0.924533
LS 174T	2.22263	2.44055	2.19364	2.44055	3.11863	3.22059	1.84	1.64188	3.68658	3.36674	3.68658	3.36674	3.24657	3.26859	3.24657	3.26859	4.49969	4.49969	3.35822	4.49969	3.54432	3.61704	3.54433	3.61704	0.346354	0.396936	0.346354	0.396936	3.50279	3.42478	3.50279	3.42478	2.64799	2.5454	2.64799	2.5454	2.3097	2.34989	2.3097	2.34989	3.8191	3.49285	3.8191	3.49285	1.08132	1.06667	1.08132	1.06667	1.56582
MeWo	1.98546	2.15689	1.98546	2.15689	3.57671	3.63676	3.57671	3.63676	4.49969	4.49969	4.49969	4.49969	4.25231	4.27867	4.25231	4.27867	3.81245	3.10878	3.07846	3.19598	4.23099	4	4	4	0.419526	0.558194	0.419526	0.558194	3.65878	3.50814	3.65878	3.50814	4.28802	3.91047	4.46282	4.49969	2.55721	2.43742	2.57536	2.43742	4.49969	4.49969	4.00003	4.49969	1.12074	1.19667	1.12074	1.19667	1.51839
MG-63	2.00728	2.19917	2.00728	2.19917	3.452	3.56624	3.452	3.56624	4.30286	4.08111	4.30286	4.08111	3.38264	3.65386	3.38264	3.65386	4.49969	4.49969	4.49969	4.49969	4	1.74348	1.79577	1.74348	0.0342766	0.322594	0.0342766	0.322594	3.50381	3.50757	3.50381	3.50757	3.39572	3.27765	3.39572	3.27765	2.94137	2.95364	2.94137	2.95364	3.99872	3.94413	3.99872	3.94413	0.790744	1.18117	0.790744	1.18117	2.07701
MOLT-4	2.02572	2.21224	1.99273	2.15326	2.9645	3.11878	2.9645	3.11878	3.69321	3.68589	3.69321	3.68589	3.1682	3.15748	3.1682	3.15748	4.46372	4.49969	4.46372	4.49969	2.93551	1.19102	1.06108	1.19102	0.239793	0.210692	0.239793	0.210692	3.21256	3.12817	3.21256	3.12817	2.26099	2.34737	2.26099	2.34737	2.16241	2.12718	2.16241	2.12718	3.53605	3.52212	3.53605	3.52212	0.390601	0.64794	0.390601	0.64794	4.28555
NCI-H460	1.71742	1.64023	1.71742	1.64023	3.42219	3.54107	3.42219	3.54107	3.7951	3.87193	3.7951	3.87193	3.0886	2.93769	3.0886	2.93769	3.47386	3.02899	3.06356	3.04212	4.27802	4	4	4	0.746046	0.269589	0.746046	0.269589	3.54253	3.55368	3.54253	3.55368	3.19624	3.24274	3.19624	3.24274	2.52778	2.46032	2.52778	2.46032	4.16238	3.97607	3.88271	3.97607	0.968837	1.14248	0.968837	1.14248	1.14815
NCI-H82	2.33974	2.5228	2.33974	2.5228	3.3487	3.4275	3.3487	3.4275	4.4683	4.34917	4.4683	4.34917	3.20848	3.48687	3.20848	3.48687	3.40517	2.93643	3.49248	2.93643	4.01077	3.92471	4.01077	3.92471	0.138057	0.411234	0.138057	0.411234	3.44344	3.43761	3.44344	3.43761	3.05556	3.01211	3.05556	3.01211	2.4236	2.39938	2.43893	2.39938	3.59319	3.69368	3.59319	3.69368	0.870579	0.951903	0.870579	0.951903	4.39277
OVCAR-3	1.67122	1.85569	1.67122	1.85569	3.32159	3.21078	0.641225	0.800369	4.49969		4.49969	4.49969	4.01375	4.05248	4.01375	4.05248	3.72131	3.06672	3.22234	3.06672	2.07918	1.8859	2.02974	1.8859	0.602868	0.71732	0.602868	0.71732	3.3899	3.44309	3.3899	3.44309	4.22423	4.06034	4.09074	4.06034	3.50329	3.86498	3.50329	3.86498	4.49969	4.49969	4.49969	4.49969	1.41085	1.12742	1.41085	1.12742	4.49969
PA-1	1.87491	2.24282	1.87491	2.24282	3.27909	3.47931	3.27909	3.47931	3.46691	3.38271	3.46691	3.38271	2.63108	2.62966	2.63108	2.62966	3.32355	3.2077	2.79624	3.2077	1.74036	1.71783	1.60775	1.71783	-0.0256097	0.286704	-0.0256097	0.286704	3.26782	3.42883	3.26782	3.42883	2.84003	2.95274	2.84003	2.95274	2.24812	2.4236	2.24812	2.4236	3.55478	3.49185	3.55478	3.49185	0.964589	1.19564	0.964589	1.19564	2.63946
RPMI-7951	1.90189	2.28433	1.90189	2.28433	3.55436	3.61933	3.55436	3.61933	4.25389	4.1048	4.25389	4.1048	3.41348	3.56885	3.41348	3.56885	1.38513	2.10582	1.38513	2.10582	1.53297	1.67837	1.45929	1.67837	0.279717	0.545131	0.279717	0.545131	3.48682	3.49488	3.48108	3.49488	3.41076	3.41387	3.41076	3.41387	2.75315	2.7095	2.72811	2.7095	4.49969	4.45375	4.49969	4.45375	1.4549	1.22338	1.4549	1.22338	0.986764
SHP-77	2.87935	3.00069	2.87935	3.00069	3.56365	3.62381	3.56365	3.62381	4.49969		4.49969	4.49969	4.11444	4.15285	4.11444	4.15285	4.46043	4.01905	4.11754	4.01905	4.49969	4	4	4	2.14075	2.09588	2.14075	2.09588	4.46604	4.49969	4.23425	4.49969	4.49969	4.49969	4.49969	4.49969	2.73212	2.59874	2.67149	2.59874	4.49969	4.49969	4.49969	4.49969	2.60705	2.67673	2.60705	2.67673	4.49969
SJCRH30	2.24088	2.61669	2.24088	2.61669	3.38825	3.44799	3.38825	3.44799	3.78228	4.49969	4.49969	4.49969	4.16388	4.13649	4.16388	4.13649	4.49969	4.49969	4.49969	4.49969	3.1116	2.28351	2.25106	2.28351	0.389271	0.527491	0.389271	0.527491	3.42494	3.33535	3.42494	3.33535	3.54277	3.37219	3.54277	3.37219	3.91132	2.81636	2.88306	2.81636	4.26742	3.41935	3.95413	3.41935	0.870671	1.42123	0.870671	1.42123	2.89351
SK-N-AS	2.14351	2.50363	2.14351	2.50363	3.34863	3.41349	3.34863	3.41349	4.49969	4.49969	4.49969	4.49969	3.9081	3.85281	3.9081	3.85281	3.55035	3.54109	3.45613	3.54109	2.80346	1.57025	1.64769	1.57025	0.527509	0.842385	0.527509	0.842385	3.78729	3.75446	3.78729	3.75446	4.09052	3.75723	3.73748	3.75723	2.79229	2.5803	2.79229	2.5803	4.31981	3.7177	3.86593	3.7177	1.46331	1.37591	1.46331	1.37591	0.978584
SR	1.81589	2.14968	1.81589	2.14968	2.99491	3.01275	2.99491	3.01275	3.64838	3.58901	3.64838	3.58901	3.07581	2.9986	3.07581	2.9986	3.32665	3.33878	3.13972	3.33878	3.47684	3.6638	3.47684	3.6638	0.335915	0.6184	0.335915	0.6184	3.54958	3.57604	3.57792	3.57604	2.35761	2.13828	2.35761	2.13828	2.51387	2.5969	2.51387	2.5969	1.81811	3.29569	1.72828	2.22102	0.980101	1.22697	0.965903	1.22697	2.97778
SW48	2.4183	2.12421	1.74908	2.12421	3.62025	0.477121	0.499687	0.499687	4.49969	4.32129	4.49969	4.32129	3.99987	3.58654	3.99987	3.58654	4.02696	4.49969	4.02696	3.37639	4.49969	2.16353	2.25564	2.16353	0.53032	0.0696928	0.53032	0.0696928	3.58351	3.4811	3.58351	3.4811	3.95074	3.05678	3.44586	3.05678	2.73194	2.37038	2.73194	2.37038	4.47552	4.16327	4.47552	4.49969	1.44502	0.809459	1.40599	0.809459	0.0795927
SW480	2.15508	2.60733	2.15508	2.60733	3.56134	3.67748	3.56134	3.67748	4.49969	4.49969	4.49969	4.49969	3.86568	3.93262	3.86568	3.93262	4.22015	3.47499	4.22015	3.47499	3.32221	3.55912	2.34763	3.02082	0.523301	0.691892	0.523301	0.691892	3.46849	3.4133	3.44643	3.4133	3.96534	3.8087	3.80856	3.8087	2.86589	2.87677	2.72561	2.87677	4.19826	4.49969	4.16953	4.49969	1.32536	1.2755	1.32536	1.2755	2.75892
SW620	2.33413	2.75591	2.33413	2.75591	3.52576	3.49584	3.52576	3.49584	4.49969	4.49969	4.49969	4.49969	3.99213	3.69397	3.99213	3.69397	3.39212	4.49969	3.39212	4.49969	4.09269	4	4	4	0.352666	0.620626	0.352666	0.620626	3.64127	3.68401	3.64127	3.68401	3.81868	3.02963	3.41111	3.02963	2.45419	2.37008	2.39282	2.37008	4.36418	4.02626	4.06137	4.02626	1.26134	1.21344	1.26134	1.21344	0.13047
U-2 OS	1.9513	2.45879	1.9513	2.45879	3.40957	3.55369	3.40957	3.55369	4.49969		4.49969	4.49969	3.94402	3.92746	3.94402	3.92746	4.49969	3.92976	3.7876	3.92976	3.50881	3.68687	3.47628	3.68687	0.870032	1.17662	0.870032	1.17662	3.93373	3.95146	3.93373	3.95146	4.05457	4.04561	4.05457	4.04561	2.84489	2.72271	2.82684	2.72271	3.21826	4.49969	3.21826	4.49969	1.73094	2.04877	1.73094	2.04877	2.49333
U-87 MG	2.34327	2.54106	2.34327	2.54106	3.70035	3.74697	3.70035	3.74697	4.49969	4.25757	4.49969	4.25757	3.88951	3.87037	3.88951	3.87037	4.49969	4.49969	4.49969	4.49969	4.17381	4	4	4	1.04643	0.955109	1.04643	0.955109	3.71806	3.56216	3.71806	3.56216	4.23193	4.14274	4.23193	4.14274	2.72603	2.47132	2.72603	2.47132	4.49969		4.49969	4.49969	1.41062	1.54858	1.41062	1.54858	2.35977
[truncated: 30 more columns]

## Sheet: S3C_other_metrics
Table S3C. correlations between replicate experiments using other metrics than IC50s
1: numbers on this row indicate Pearson correlations between replicate profiles, Units: AUC in (%-activity)· nM, GI50 in nM, DSS has no units
2: AUC correlation for dasatinib, docetaxel and trametinib not calculated, because dose-ranges were different
compound	AZD-8055						afatinib						carboplatin						cisplatin						dabrafenib						dasatinib						docetaxel						ICG-001						irinotecan
correlations1	AUC	0.822332	DSS	0.434989	GI50	0.808074	AUC	0.796238	DSS	0.908988	GI50	0.863595	AUC	0.732655	DSS	0.918268	GI50	0.915849	AUC	0.722926	DSS	0.911081	GI50	0.770391	AUC	0.745545	DSS	0.388381	GI50	0.881942	AUC2		DSS	0.7505	GI50	0.638335	AUC2		DSS	0.842187	GI50	0.907754	AUC	0.494824	DSS	0.924466	GI50	0.923053	AUC
exp. nr.	13OL051	15OL292	13OL051	15OL292	13OL051	15OL292	13OL098	14OL224	13OL098	14OL224	13OL098	14OL224	14OL157	15OL293	14OL157	15OL293	14OL157	15OL293	14OL180	15OL283	14OL180	15OL283	14OL180	15OL283	13OL074	15OL268	13OL074	15OL268	13OL074	15OL268	13OL035	15OL269	13OL035	15OL269	13OL035	15OL269	13OL042	15OL294	13OL042	15OL294	13OL042	15OL294	13OL125	14OL229	13OL125	14OL229	13OL125	14Ol229	13OL053
769-P	1033.76	1121.42	20.798	19.7805	177.481	267.475	997.784	1045.39	10.696	8.53337	1511.07	2729.41	1735.31	1518.05	4.26778	3.20875	>31600	22872.6	1316	1299.91	8.06507	9.84588	3952.21	2701.02	1825.38	1549.4	6.72345	10.2706	8649.57	1473.01	739.27	1014.13	28.5432	20.1462	36.5314	77.9064	1205.5	1081.29	11.9703	16.7513	11.9881	14.9958	1758.56	1573.69	4.50237	5.13287	11369.6	8142.81	1283.65
786-O	994.393	1008.03	24.3551	21.5101	157.206	320.683	1197.81	1310.76	12.2959	11.189	2240.98	3218.13	1654.35	1495.03	3.12366	2.3542	15435.5	18016.5	1329.38	1397.91	13.6702	12.7483	2034.05	2551.17	1639.18	1727.49	11.5533	110.11	2888.33	>31600	1033.88	1306.84	24.5457	13.9061	201.74	400.375	1292.65	1187.3	12.2119	15.4579	17.7821	32.0248	1528.33	1474.38	6.89784	5.96125	6814.66	7717.89	1189.62
A-172	1025.98	1013.51	22.629	17.7246	82.9376	133.032	1152.95	1145.24	11.7989	11.5994	1683.56	1539.12	1764.38	1763.03	0	0	>31600	>31600	1714.67	1756.32	2.36162	2.60571	>31600	18727.3	1620.6	1852.69	2.36483	0	>31600	>31600	1080.91	1409.96	19.1338	15.2814	119.427	187.782	1007.21	826.76	21.6474	29.0294	2.54459	2.20411	1592.06	1736.73	7.72212	8.55623	4555.07	4272.84	1476.08
A-204	891.225	914.648	20.0005	30.8841	34.3837	41.1957	1187.07	1335.25	12.6134	10.662	1172.49	2548.66	1617.72	1455.75	0	0	15574	ND	1390.84	1338.22	6.36812	5.22581	4389.74	4077.29	1445.43	1650.13	8.85457	7.12355	2015.35	4202.02	892.866	1075.51	25.6265	18.035	22.101	48.3362	1222.68	1216.79	20.903	15.245	2.27118	15.4853	1453.17	1498.8	5.86822	4.23148	4950.41	8643.48	1233.18
A375	832.742	973.32	27.0048	22.5609	92.9301	211.883	929.901	1294.34	13.7556	14.3013	1138.75	1963.93	1705.66	1638.01	0	2.58249	25673.7	23395.1	1389.93	1327.31	8.27312	11.0497	4861.4	3048.67	884.866	883.423	31.8273	36.8443	35.1593	30.7921	970.557	1414.73	19.981	14.1922	360.336	1095.55	1010.52	843.212	19.0632	26.7998	5.38864	4.42892	1443.83	1605.31	7.5857	9.08604	6158.93	5285.39	1402.28
A-427	1115.97	974.614	18.778	18.1006	211.993	101.359	1209.84	1066.8	11.9334	12.9372	2277	1507.01	1833.31	1651.24	0.0140593	NA	>31600	>31600	1543.27	1299.39	4.05616	3.03318	11582.5	12007	1536.58	1916.57	11.4913	11.6099	3023.96	3640.6	1094.23	1309.04	12.282	7.82202	1063.18	>1000	1147.38	890.045	20.6227	24.3669	3.66302	2.46424	1488.63	1153.56	12.6286	11.9496	2609.32	1741.77	1333.56
A-498	747.938	779.01	26.0853	30.481	51.9379	51.0082	1078.14	1201.4	10.6859	12.3059	2056.03	2005.07	1830.68	1727.89	0	0	>31600	30019.1	1514.39	1482.9	6.04174	5.9456	4891.13	7566.85	1442.24	1554.6	12.6034	10.0737	1438.5	1343.56	1117.55	1424.41	20.4926	12.4017	391.334	428.922	1186.75	1156.27	14.9166	16.5156	10.6985	23.5793	1445.79	1513.26	6.74673	6.96649	6142.85	5786.82	1502.75
A-549	787.36	854.659	22.1271	28.579	127.381	83.1621	1159.2	1162.06	10.4901	9.60199	2461.42	2800.14	1603.9	1632.38	0	2.70577	>31600	22031.7	1364.09	1387.69	7.04349	7.54085	5405.51	5078.58	1603.95	1701.21	10.2161	0	3565.08	>31600	1066.8	1209.1	4.11414	12.58	6670.08	798.816	1050.32	913.687	22.3502	31.1767	2.375	2.02838	1443.8	1370.6	7.76661	7.78514	4940.92	4510.31	1374.15
ACHN	808.573	886.96	32.4458	21.8373	39.4009	162.484	872.655	919.839	22.5313	12.9122	137.331	>100	1603.29	1491.54	3.49144	3.65447	13292.8	12988.6	1447.96	1367.6	11.8104	7.33389	3051.71	5132.17	1182.84	1349.07	15.1454	15.9837	883.045	772.002	729.881	1019.49	29.1434	21.5971	41.2286	70.8776	1501.15	1264.31	10.8136	12.4285	24.1023	50.0771	1829.64	1517.33	3.14028	4.25184	16152.4	10284.5	1430.98
AN3 CA	724.159	828.159	25.7824	24.2027	52.8894	116.587	1230.43	1564.61	12.2278	12.4333	2143.23	3389.72	1765.42	1759.5	0.681891	0	>31600	>31600	1424.04	1501.17	6.16015	4.11957	5981.72	9841.96	1791.97	1770.86	1.17791	2.67967	>31600	>31600	1364.33	1574.15	13.3859	7.89701	1485.36	1318.43	807.978	817.394	25.3029	27.8288	0.844623	2.06828	1615.69	1704.31	6.13748	5.29832	7143.88	8654.68	1439.11
AU-565	850.612	938.682	28.9825	24.188	43.8094	113.023	443.876	731.501	32.17	30.8203	9.93583	26.4992	1899.57	1504.32	3.8251	3.48935	12196.2	ND	1446.63	1268.74	11.5344	9.85057	2323.81	2433.09	1545.56	1638.39	8.2831	4.70127	3043.38	>1000	1462.13	1599.31	5.26896	3.73401	6209.89	2911.43	932.78	857.636	23.8297	25.4809	1.78634	4.67189	1444.52	1334.47	12.4644	9.83295	2197.75	2851.32	1243.78
BT-20	1145.1	1142.13	19.0075	20.0996	113.175	120.924	1292.03	1321.51	9.4867	9.94616	3194.53	3220.55	1831.72	1882.66	0	0	>31600	>31600	1699.8	1700.31	4.13386	4.53617	10727.9	11834.5	1857	2046.71	0	0	>31600	>31600	1339.54	1473.68	9.17261	7.90215	919.257	499.922	1164.94	829.84	16.0949	25.2727	5.55569	2.46526	1662.19	1804.96	2.65998	4.05387	12046.5	8942.24	1661.03
BT-549	857.041	741.261	31.7643	20.7538	50.6912	102.075	1370.15	1138.71	11.5692	15.3175	2837.32	1137.61	1751.82	1666.84	1.62266	0.983229	20934.2	18813.4	1317.87	1343.06	8.56522	9.22488	3582.47	3331.49	1653.09	1673.86	8.38055	19.5917	4807.15	>31600	946.433	1083.32	29.7991	13.8263	68.87	102.27	971.238	614.605	21.7854	27.5699	2.65978	1.08266	1511.3	1312.61	9.83152	11.5165	3160.67	1965.14	1213.61
BxPC-3	925.752	993.004	23.9699	18.1736	84.0894	292.029	1043.53	1124.48	8.94515	7.38931	2758.18	4351.32	1800.37	1733.56	0	2.15246	22175.1	18631.2	1292.69	1203.55	9.27239	8.47105	2771.47	2737.16	1493.52	1544.27	11.8281	11.9554	1743.13	977.758	818.05	1098.87	22.5708	15.4916	119.707	141.971	1087.63	1004.81	24.3604	26.3967	2.18533	4.76152	1540.69	1418.8	9.05695	7.28265	3123.48	3947.31	1469.85
C-33 A	832.42	851.927	18.9945	21.7964	97.7955	99.3803	704.11	752.396	28.1573	26.7454	26.5181	36.2443	1685.72	1393.91	3.31038	3.32972	16272.1	12452.5	1378.68	1372.93	11.724	9.62757	2424.2	3439.22	1924.63	1735.17	13.3667	0	3174.2	>31600	639.551	794.408	32.1572	20.1344	8.53225	29.8265	1243.01	874.561	19.5492	27.1747	3.54064	2.24213	1493.37	1196.78	11.3791	9.49011	2838.61	2470.28	1259.81
CAL 27	958.214	1026.16	19.0632	23.2809	205.984	187.87	909.767	718.819	20.7283	24.6738	264.113	15.1901	1786.72	1657.35	0	3.61507	26335.1	12284.9	1501.9	1364.31	10.8924	11.7239	3310.1	2695.43	1852.04	1815.77	1.05689	0	28156.5	>31600	936.754	1120.98	28.6895	22.4565	146.53	117.655	779.533	529.828	26.0418	37.8781	1.55974	0.77615	1516.86	1460.8	8.51413	9.95886	4774.64	3317.99	1209.32
CCRF-CEM	857.14	983.52	23.3139	23.7544	85.2004	148.439	1082.64	946.785	15.9984	16.4901	964.97	585.133	1625.45	1554.14	5.84613	5.54413	8811.43	8763.12	1264.73	1169.27	13.4286	13.9159	1784.56	1343.03	1674.04	1572.58	0	2.33471	20329.4	>31600	1537	1437.51	7.32344	1.50563	4480	5861.34	1087.46	979.689	20.3748	24.9223	5.67505	8.48917	1439.44	1387.64	8.38206	9.52988	3860.72	1953.25	832.409
DLD-1	985.003	1106.51	23.1715	18.1824	190.785	459.248	1161.83	1189.92	15.05	12.4695	1381.24	1985.66	1761.07	1657.48	0	0	>31600	>31600	1463.74	1447.57	4.01045	6.2573	11718.4	7450.53	1659	1675.28	11.1048	5.65704	3412.2	>31600	1321.81	1475.06	11.0446	4.9839	2695.67	3368.93	1308.88	1345.67	11.465	12.2273	23.8207	69.9355	1581.82	1542.98	4.2005	3.49889	12312.4	13868.4	1477.42
FaDu	1122.46	1022.22	18.9897	22.37	212.116	158.32	704.88	775.108	28.0473	26.0293	7.20471	5.83088	1776.74	1658.4	0	1.45379	25194.4	23807.3	1495.79	1441.21	7.84354	7.99697	4812.12	4588.4	1712.34	1588.92	9.75908	3.81977	3468.91	>31600	1005.12	1085.71	22.1365	12.8059	207.239	206.297	1215.85	1027.43	19.4096	24.0237	1.85143	1.05531	1574.06	1336.74	6.02723	6.49007	6853.32	4540.23	1215.91
HCT 116	1068.16	1151.9	17.9876	18.0237	326.245	498.634	1094.64	1119.27	17.6174	13.9694	818.41	1545.8	1980.02	1772.25	0	0	>31600	>31600	1553.91	1335.37	7.52111	6.67901	6437	6321.44	1535.26	1741.54	8.45953	9.7495	>31600	>31600	1328.6	1361.56	3.26452	0	13261.4	>10000	862.565	629.292	24.6915	32.4769	2.07213	1.66515	1400.98	1200.38	13.6084	11.9863	2342.52	2246.3	1272.91
HCT-15	871.111	927.733	26.6402	22.3395	103.969	213.823	1049.32	1212.81	15.0763	16.3736	1156.34	1218.98	1729.45	1643.69	0	0	>31600	>31600	1417.68	1296.53	7.17335	8.52598	6408.91	4426.86	1481.96	1707.84	11.1036	5.89338	3274.2	>31600	1193.02	1452.9	14.9798	12.0688	1258.84	1103.84	1315.63	1188.1	8.37752	10.8719	45.9576	81.2127	1631.85	1586.54	3.2335	3.59594	16461.9	14406.6	1384.43
Hs 578T	828.823	1046.15	23.3379	23.2592	64.4128	167.173	1543.14	1358.1	13.388	13.1351	2274.77	2465.66	1866.92	1771	0	0.982903	30801.7	>31600	1434.74	1367.92	6.25207	6.46609	14188.8	3037.43	1646.23	1953.54	8.42866	0	2585.1	>31600	862.889	1073.32	30.7455	20.2836	49.487	67.8935	894.013	654.195	24.7546	30.9523	1.47518	1.55743	1774.83	1462.8	11.7638	12.2647	2671.66	1842.51	1429.13
J82	948.699	1029.44	17.7471	21.1544	135.685	179.248	1164.42	1241.23	10.5673	9.15373	2161.8	3164.23	1683.67	1642.12	0	2.47633	21198.7	17688.9	1475.7	1321.15	9.79795	9.83521	3155.12	2538.41	1769.31	1805.42	0	0	>31600	>31600	1131.09	1216.89	14.8898	18.3511	656.25	103.533	1305.87	1155.33	11.5106	14.0676	16.0484	30.575	1663.67	1578.83	5.37666	4.64589	8284.77	8521.11	1347.8
Jurkat E6-1	941.797	1026.33	29.6557	19.7983	73.8145	250.285	1131.69	1150.54	20.1441	14.2544	650.191	1430.01	1310.74	1354.82	12.4911	10.763	2133.05	2942.75	1023.57	1021.89	18.768	17.0873	624.955	803.226	1493.37	1567.54	11.9662	7.02086	3040.14	>3160	980.317	1340.94	10.6679	5.69265	1722.03	1763.22	742.827	740.91	23.3537	27.2907	1.95282	3.84829	1308.29	1561.71	9.29381	6.45757	3377.92	6967.59	751.559
K-562	970.253	1100.58	15.2795	18.08	278.478	505.804	1246.28	1323.07	11.1135	10.854	3006.08	3602.22	1787.19	1695.93	3.51939	1.18778	>31600	>31600	1491.69	1423.9	5.708	5.31725	11158.4	8643.88	1574.93	1714.63	4.5313	2.22437	19904.5	23541.2	102	1177.34	0	22.0772	0.46	0.528351	865.257	844.317	18.9641	27.99	2.62185	4.53086	1398.86	1437.52	9.0135	10.1638	3038.46	3162.63	1341.08
LoVo	842.385	820.994	26.8882	27.1084	40.4398	51.1481	999.35	1001.08	11.5694	13.2794	1534.57	>1000	1681.6	1579.72	0	1.91829	>31600	26996.2	1438.9	1308.52	7.27588	7.38035	5271.41	4948.16	1602.84	1705.98	16.5664	10.2463	1606.34	2010.07	1201.58	1327.08	15.5456	6.73943	900.92	1574.31	1196	921.856	17.2963	26.2343	7.87088	4.36703	1189.14	1369.25	10.4566	13.1742	2438.5	2164.64	1413.64
LS 174T	1019.69	1117.03	24.3268	22.3026	189.401	310.068	1144.53	1034.1	15.7844	12.6363	958.658	1271.75	1589.51	1513.31	6.15415	7.76309	7248	4752.69	1368.11	1529.9	12.0872	15.11	1954.19	1736.54	1721.95	1981.38	0	1.09816	>31600	>31600	1145.53	1621.77	9.51659	6.98524	2299.85	2551.64	904.965	821.03	22.6211	29.7218	2.20208	2.57908	1425.72	1355.77	12.159	12.2923	2861.35	2618.35	1040.44
MeWo	1189.26	1167.27	20.6353	17.9942	151.516	233.635	1294.04	1330.13	10.976	9.98182	2605.12	3216.56	1776.61	1815.9	0	1.0253	>31600	>31600	1542.94	1626.91	3.55601	3.53995	10834.4	11058.1	1620.17	1841.49	7.87402	5.28442	3708.16	>31600	1574.39	1748.54	3.2689	0	12362.3	>10000	1203.18	1093.96	17.4879	17.7806	3.17517	5.42211	1581.99	1612.2	6.72783	8.31256	5077.11	3412.73	1604.49
MG-63	790.188	858.842	25.2869	24.6199	92.9717	148.612	1379.96	1430.01	13.5902	12.2958	2339.43	2948.96	1514.16	1594.13	2.95326	3.88284	14924.5	13199.3	1100.24	1287.14	11.0795	9.04488	1888.92	3573.5	1731.42	1954.2	0	0	>31600	>31600	1190	1424.02	7.66008	11.8945	>10000	625.453	832.207	673.115	30.7125	30.6142	0.974579	1.99797	1410.92	1398.52	9.99836	10.1271	3249.86	3250.09	1268.5
MOLT-4	850.209	872.919	28.2875	23.931	81.6773	122.181	1102.2	1166.19	19.0146	16.757	732.611	1100.45	1485.63	1449.59	10.1002	10.048	4229.16	4243.02	1139.65	1217	15.6029	16.7943	1249.38	1223.55	1592.63	1754.47	3.43343	0	18399.4	>31600	1132.78	1523.43	20.1802	18.7014	354.906	7692.79	815.06	567.38	27.7646	32.4399	1.59719	1.46265	1211.05	1266.31	15.6295	17.6909	1454.97	1105.3	762.309
NCI-H460	689.762	733.912	27.6199	33.2441	58.2641	48.5508	1188.26	1257.93	12.7564	11.4904	2106.55	2872.17	1453.46	1562	6.83974	7.75903	6544.71	6789.53	1192.02	1207.94	17.1821	20.0579	1028.54	810.51	1669.13	1844.52	12.5604	7.75725	2729.19	>31600	1432.62	1630.86	2.33378	0	17258.8	>10000	1071.69	680.854	19.0577	33.0207	5.41307	1.81496	1304.45	1452.91	10.4745	11.3702	3368.13	3443.29	1184.26
NCI-H82	969.43	1035.92	18.4856	17.7548	292.998	427.699	1373.67	1203.89	15.213	12.2293	2026.26	2426.61	1568.95	1636.67	2.11103	3.51656	23509.9	17981.7	1236.82	1267.26	13.2738	10.6345	1549.92	2746.18	1542.25	1728.82	12.1685	7.82918	2102.18	>31600	1387.06	1753.25	5.03647	1.94461	9147.04	7585.82	872.949	802.726	26.4685	27.9503	1.39078	2.62905	1324.66	1302.57	12.2008	12.2375	2735.78	2609.48	1364
OVCAR-3	923.406	900.957	26.6079	25.2949	28.9719	42.7311	1039.22	979.491	11.3202	12.1306	848.526	626.503	2014.66	1700.83	NA	0	>31600	>10000	1586.8	1442.95	5.88184	5.28226	9675.09	7270.3	1666.58	1786.94	8.92636	4.8552	3318.6	>31600	916.968	1028.65	18.4714	18.0788	88.6629	49.0347	1048.56	937.471	20.9182	23.9971	2.77384	3.61377	1410.33	1341.53	10.7128	9.82694	2181.88	2294.49	1631.93
PA-1	773.119	831.798	28.281	25.1332	69.0607	173.977	1250.73	1422.74	15.176	13.4379	1779.01	2762.63	1301.47	1263.7	11.7919	13.8195	2287.97	2019.66	1145.7	907.532	25.5865	21.2391	365.207	338.973	1560.82	1721.79	14.3863	9.60299	1573	2204.3	707.538	977.369	29.3926	17.2964	45.3883	79.3153	703.692	667.78	31.0505	33.8848	0.886921	1.88567	1186.75	1393.65	14.4808	13.8102	1751.02	2574.94	1059.58
RPMI-7951	881.686	1068.81	26.4364	23.6281	87.5648	215.29	1355.86	1283.02	11.6689	9.93235	3198.46	3802.18	1622.75	1561.8	3.11882	4.54047	14549.3	11155.3	1338.15	1336.6	13.075	10.8233	2146.67	3097.49	1239.94	1331.12	15.3696	12.1487	>31600	2213.24	682.237	1066.38	31.3046	27.2331	32.388	44.6473	806.318	728.107	24.8838	28.2025	1.6094	2.98333	1421.28	1451.46	10.2508	9.77895	3121.35	3291.38	1260.66
SHP-77	1293.53	1383.27	9.67951	11.0205	864.271	1135.67	1519.03	1481.7	12.6771	11.5837	3028.58	3350.78	2048.97	1693.65	1.00581	0.953403	>31600	>31600	1353.49	1694.71	3.91012	4.23266	8283.01	10601.2	1569.91	1722.2	1.24127	2.99675	20666.3	12482.7	1756	1750.91	0	0	>31600	>10000	1555.28	1394.68	3.99533	11.1049	111.52	107.758	1854.61	1616.02	2.08521	0	20685.4	23985.4	1531.23
SJCRH30	937.548	977.035	25.1929	21.7752	104.684	208.081	1170.15	1170.37	12.4991	11.8199	1779.26	2549.87	1845.72	1945.64	2.19178	0	>31600	29694.5	1473.62	1594.64	4.43764	5.02578	8302.71	8734.9	1860.05	1858.37	0	0	>31600	>31600	1019.07	1465.11	14.6388	13.4313	325.794	283.586	1164.03	937.459	20.2613	24.3889	2.23718	3.3888	1413.86	1311.92	12.1953	11.6946	2186.37	1991.38	1297.59
SK-N-AS	1001.96	1107.93	21.2681	18.3937	141.918	338.293	1205.23	1245.24	12.8765	12.2338	1869.37	1986.66	1949.01	1833.85	0	0	>31600	29443.2	1740.82	1434.52	7.40831	6.49295	5636.14	5436.86	1894.9	1851.47	12.8086	4.43484	3355.5	>31600	982.999	1218.86	19.7476	11.787	101.357	62.9034	1125.88	971.006	17.9285	20.7708	3.13217	6.47697	1542.01	1645.89	5.51811	5.88809	6571.74	6311.16	1585.18
SR	681.296	725.237	30.8688	23.9742	54.5045	121.2	1256.9	1066.44	20.6698	17.079	719.417	523.735	1473.33	1253.09	10.7049	9.32037	3248.91	3369.98	1078.12	1124.07	15.944	18.2789	1006.39	725.362	1425.3	1480.96	14.6216	8.98314	1805.58	2350.73	1222.53	1457.5	10.4744	3.79729	2325.82	3526.65	849.664	865.398	25.8993	31.4309	1.86757	3.85784	1658.48	1422.14	12.3355	10.1978	3456.19	3364.41	926.741
SW48	1419.88	1096.94	8.51603	24.101	456.815	127.221	750.797	540.681	5.83815	4.07557	2581.84	<3.16	1883.23	1725.03	0.133003	3.31622	>31600	14161	1611.22	1507.93	6.05614	11.6009	5045.66	2682.45	1974.02	2017.07	3.02116	1.71469	13635.7	>31600	1438	1379.22	0	12.4853	>31600	366.697	1072.01	620.821	24.5372	38.0642	2.41997	0.963964	1595.7	1706.17	7.97322	9.2698	3763.69	3575.29	1670.61
SW480	1074.57	1170.18	19.7397	16.8794	192.717	522.436	1234.97	1387.12	10.726	9.66982	2879.43	4011.83	1829.22	1775.37	0	0	>31600	>31600	1512.49	1537.14	7.57793	6.52786	6520.14	7765.63	1380.03	1846.62	3.44342	5.15478	12335.6	>31600	1188.82	1420.2	14.1864	5.92133	1046.37	2537.5	1091.92	1031.85	21.0862	20.9628	3.32234	6.56346	1447.68	1458.26	10.912	10.082	3000.44	2770.26	1365.29
SW620	1105.26	1140.98	19.2431	16.3323	296.712	700.358	1240.43	1251.87	11.5566	12.2068	2688.83	2435.45	1900.02	1793.01	NA	0	>31600	>31600	1549.59	1437.46	6.22504	9.43374	7903.56	4184.8	1741.46	2229.9	14.0054	NA	2768.08	>31600	1257.41	1647.82	3.78554	0	12025.8	>10000	1068.84	890.243	23.0494	24.6894	2.40486	4.55963	1691.73	1507.49	7.38381	6.39989	6028.3	6273.66	1495.91
U-2 OS	871.486	989.822	25.2794	20.3444	84.0249	285.927	927.269	1150.52	9.65973	10.4306	1859.51	2398.69	1710.2	1831.76	0.399377	0	>31600	>31600	1397.21	1441.85	6.03731	6.7192	8078.54	6697.49	1567.2	1798.33	0	1.89752	>31600	>31600	1112.78	1487.93	9.86323	6.86476	1938.91	2160.38	1110.3	987.682	17.3683	19.4274	7.0878	13.7292	1714.7	1530.03	5.7519	4.74593	8786.07	9366.31	1597.58
U-87 MG	1166.79	1189.35	17.8421	17.1981	260.376	465.798	1318.91	1338.52	9.05565	8.31326	4109.82	4576.22	1709.92	1624.6	0	1.63863	>31600	>31600	1503.49	1352.83	7.1254	6.66492	5164.69	4779.92	1830.63	1902.49	0	0	>31600	>31600	1371.68	1657.06	3.1896	0	13220	>10000	1341.21	1149.05	12.8532	19.4897	12.2249	10.6876	1597.61	1436.02	7.11279	7.48622	5638.09	3957.68	1555.16
[truncated: 59 more columns]

## Sheet: S3D_all_correlations
Table S3D: Pearson correlations between the 10log IC50 profiles of all compounds tested
compounds	EPZ-005687	GSK-343	UNC-1999	EPZ-5676	temozolomide	ruxolitinib	Mps1-IN-1	sunitinib	MK-1775	CHIR-124	SCH-900776	dabrafenib	vemurafenib	venetoclax	roscovitine	dacarbazine	thioguanine	mercaptopurine	EPZ-6438	GSK-126	bortezomib	methotrexate	NVP-ADW742	ceritinib	GSK-1838705A	busulfan	MK-5108	MLN-8054	I-BET-762	JQ1	navitoclax	ABT-737	AT-7519	vincristine	ICG-001	docetaxel	paclitaxel	GSK-461364	vinflunine	BI-2536	volasertib	carfilzomib	dinaciclib	epothiloneB	BIIB-021	KU-60019	TH-588	cytarabine	crizotinib
EPZ-005687	1	0.600879	0.563011	0.509653	0.511154	0.484553	0.379608	0.524982	0.469828	0.265458	0.374199	0.101594	0.0432601	0.190532	0.234272	0.336733	0.309457	0.251701	-0.0679391	0.235499	-0.114529	0.11841	-0.179844	0.303106	0.21106	0.167356	0.167588	0.221461	0.370215	0.455453	0.34034	0.384432	0.280385	0.325641	0.257372	0.120385	0.243304	0.363422	0.402459	0.281932	0.340486	0.266425	0.391428	0.00647151	0.275037	0.496086	0.307108	0.357534	0.537873
GSK-343	0.600879	1	0.766484	0.357761	0.308727	0.397248	0.339278	0.442034	0.296215	0.166625	0.283107	0.286832	0.246058	0.123779	0.171516	0.107867	0.206351	0.24625	-0.116209	0.382739	0.166166	0.211449	-0.182806	0.205788	0.264125	0.0224032	0.10319	0.086613	0.0952112	0.0614004	0.187526	0.162836	0.344548	0.325672	0.246374	0.125134	0.202053	0.215954	0.344857	0.177312	0.212278	0.272059	0.365811	0.0431575	0.196566	0.389115	0.243576	0.110349	0.316671
UNC-1999	0.563011	0.766484	1	0.45027	0.367253	0.371826	0.296829	0.529676	0.418029	0.304489	0.3383	0.176295	0.212785	0.207236	0.303543	0.145639	0.319818	0.170317	-0.02459	0.416623	0.235611	0.210645	-0.1409	0.366235	0.294808	0.129064	0.290515	0.0412564	0.341207	0.318638	0.278895	0.34678	0.334854	0.360922	0.243048	0.0350729	0.0568348	0.187073	0.309242	0.202852	0.251813	0.303639	0.344541	0.0372549	0.133914	0.485507	0.254945	0.226701	0.455123
EPZ-5676	0.509653	0.357761	0.45027	1	0.831244	0.642418	0.581114	0.402794	0.336516	0.143847	0.191907	0.0545539	0.278296	0.136985	0.514973	0.288916	0.422923	0.183952	-0.0259307	0.21497	0.041645	0.140093	0.0109809	0.732713	0.613112	0.333114	0.248618	0.286975	0.334106	0.288813	0.00524756	0.439081	0.383284	0.238374	0.0270568	0.0285804	0.0353918	0.172332	0.354157	0.197465	0.237764	0.121295	0.470327	0.108411	0.31579	0.237302	0.27181	0.0701601	0.578126
temozolomide	0.511154	0.308727	0.367253	0.831244	1	0.527117	0.486605	0.379478	0.275188	0.174628	0.212425	-0.02585	0.189525	0.0767099	0.355562	0.361049	0.40094	0.129432	-0.0707061	0.171991	-0.0139224	-0.176686	-0.00182534	0.566315	0.584765	0.247907	0.132351	0.223264	0.337319	0.309702	-0.0870056	0.39003	0.274817	0.186706	-0.00249515	-0.0181274	-0.0189773	0.144133	0.327149	0.154313	0.215666	0.0266482	0.374223	0.13788	0.237292	0.209218	0.278417	0.062949	0.614326
ruxolitinib	0.484553	0.397248	0.371826	0.642418	0.527117	1	0.576612	0.552941	0.328644	0.202694	0.291846	0.0823968	0.161669	0.263452	0.467629	0.213668	0.213162	0.0527682	-0.0397743	0.071869	0.135064	0.146835	0.0718078	0.501188	0.501638	0.313707	-0.013819	0.157393	0.2019	0.134505	0.0943166	0.316623	0.456282	0.39441	0.129981	0.20654	0.243458	0.157939	0.31833	0.248234	0.287629	0.138789	0.454956	0.0997434	0.358234	0.22945	0.414058	0.277909	0.541026
Mps1-IN-1	0.379608	0.339278	0.296829	0.581114	0.486605	0.576612	1	0.681849	0.174317	0.221903	0.16653	0.143384	0.202732	-0.0025006	0.288042	0.242021	0.355637	0.0870159	-0.208316	0.18417	0.230913	-0.0430288	0.245213	0.578281	0.563729	0.331237	0.14282	0.366277	0.140771	0.323004	0.037791	0.175748	0.28669	0.190828	0.250146	0.233726	0.352029	0.201488	0.339124	0.187436	0.251142	0.218218	0.41053	0.282367	0.464824	0.453024	0.445878	0.275589	0.603334
sunitinib	0.524982	0.442034	0.529676	0.402794	0.379478	0.552941	0.681849	1	0.59399	0.429823	0.367633	0.220618	0.335298	0.168069	0.398912	0.391136	0.341724	-0.0119727	-0.0189914	0.237459	0.31646	0.0877538	0.109592	0.421409	0.37173	0.234344	0.207686	0.273656	0.200795	0.36597	0.200792	0.311073	0.268434	0.20362	0.118115	0.090842	0.0763412	0.283817	0.416657	0.20499	0.382324	0.416501	0.435429	0.5489	0.476293	0.530504	0.519375	0.584762	0.698959
MK-1775	0.469828	0.296215	0.418029	0.336516	0.275188	0.328644	0.174317	0.59399	1	0.637451	0.696982	0.290375	0.282997	0.353586	0.318351	0.226955	0.224775	-0.0399115	-0.00799975	0.105967	0.0675293	0.100942	-0.213981	0.20533	0.0926224	0.0532621	0.0955201	0.0818014	0.423026	0.377179	0.229176	0.325473	0.338216	0.264981	0.17576	0.0232662	0.0259396	0.195841	0.265309	0.214621	0.291479	0.227056	0.326465	0.296034	0.246241	0.281122	0.160828	0.36729	0.370664
CHIR-124	0.265458	0.166625	0.304489	0.143847	0.174628	0.202694	0.221903	0.429823	0.637451	1	0.830111	0.207265	0.188711	0.21153	0.187089	0.24606	0.134906	-0.0991446	0.205522	0.151542	0.261513	0.0447703	0.0727322	0.174867	0.164783	0.124187	0.153931	0.113329	0.321256	0.26463	0.253489	0.204855	0.130743	0.120758	0.194347	-0.041329	-0.080694	-0.0501201	0.0737253	-0.0411045	0.0957683	0.0276146	0.183374	0.264761	0.289941	0.250534	0.212973	0.391301	0.353626
SCH-900776	0.374199	0.283107	0.3383	0.191907	0.212425	0.291846	0.16653	0.367633	0.696982	0.830111	1	0.148415	0.0254419	0.201842	0.0895433	0.200816	0.101348	-0.133699	0.136919	0.176588	0.143339	0.00256434	-0.204519	0.086101	0.0773481	0.0568533	0.0575581	0.00231273	0.258634	0.19067	0.259214	0.199341	0.279154	0.262103	0.284163	0.0150198	-0.0008863	-0.0116221	0.150829	0.0103416	0.0700313	0.0737922	0.210109	0.156829	0.273361	0.158849	0.117799	0.344334	0.275289
dabrafenib	0.101594	0.286832	0.176295	0.0545539	-0.02585	0.0823968	0.143384	0.220618	0.290375	0.207265	0.148415	1	0.678053	0.100178	0.344247	0.069563	0.0440669	-0.0195067	-0.0462849	-0.0244542	-0.24273	0.0211108	-0.0364123	0.0646336	0.0832217	-0.123804	-0.00968819	0.0546344	-0.0537225	0.0336322	-0.0577013	-0.14766	0.0420062	-0.0736904	0.120029	-0.0464434	0.027782	0.276015	0.152858	0.0413512	0.136886	0.0627911	0.232494	0.241359	0.141652	0.422765	0.138089	0.0795278	0.0326809
vemurafenib	0.0432601	0.246058	0.212785	0.278296	0.189525	0.161669	0.202732	0.335298	0.282997	0.188711	0.0254419	0.678053	1	0.013496	0.252831	-0.018419	0.0805921	0.138001	-0.118335	0.114584	0.0958869	0.0686958	0.275517	0.371271	0.379433	0.011857	0.0283531	-0.00126181	0.14028	0.182901	-0.0286943	0.0196356	0.144798	0.073575	0.135423	0.0137415	-0.00268207	0.229802	0.205066	0.129372	0.232512	0.108232	0.302227	0.291968	0.0493056	0.290481	0.161979	0.013759	0.276076
venetoclax	0.190532	0.123779	0.207236	0.136985	0.0767099	0.263452	-0.0025006	0.168069	0.353586	0.21153	0.201842	0.100178	0.013496	1	0.640766	0.124659	-0.00149922	-0.00056476	-0.0592135	0.0251202	0.000699706	0.113028	-0.0296843	0.11293	0.152256	0.18036	-0.00822791	-0.0198122	0.265072	0.188197	0.43549	0.46897	-0.0260917	0.00519614	0.0292219	-0.0605392	-0.00755525	-0.0343721	-0.0692825	-0.00849752	0.0523951	0.0268096	0.0396346	-0.122979	0.051343	-0.0396626	0.0222614	0.252972	0.170921
roscovitine	0.234272	0.171516	0.303543	0.514973	0.355562	0.467629	0.288042	0.398912	0.318351	0.187089	0.0895433	0.344247	0.252831	0.640766	1	0.121294	0.0981589	0.0589769	-0.0821664	-0.0666684	-0.00415141	0.114191	0.0586217	0.459334	0.441598	0.309012	0.262597	0.290246	0.103731	0.0968409	0.235345	0.424599	0.20001	0.0182995	-0.0789241	-0.0778799	-0.0994955	0.027617	0.102359	0.0260398	0.167542	0.105171	0.377712	0.18577	0.38074	0.344634	0.239876	0.27879	0.366079
dacarbazine	0.336733	0.107867	0.145639	0.288916	0.361049	0.213668	0.242021	0.391136	0.226955	0.24606	0.200816	0.069563	-0.018419	0.124659	0.121294	1	0.67307	0.541392	0.399219	0.12165	0.185931	0.229863	-0.0134474	0.259183	0.237659	0.16925	0.190856	0.244286	0.377447	0.511249	0.347364	0.306342	0.101408	0.221415	0.215344	0.123856	0.161216	0.359398	0.378025	0.180065	0.304248	0.284017	0.260768	0.162212	0.331631	0.32861	0.312184	0.358721	0.566581
thioguanine	0.309457	0.206351	0.319818	0.422923	0.40094	0.213162	0.355637	0.341724	0.224775	0.134906	0.101348	0.0440669	0.0805921	-0.00149922	0.0981589	0.67307	1	0.68431	0.165225	0.214156	0.218193	0.148365	-0.0250387	0.350419	0.286405	0.257551	0.309334	0.272913	0.375791	0.454925	0.243434	0.320424	0.377374	0.350025	0.32192	0.249948	0.182508	0.357014	0.481317	0.368262	0.440881	0.476748	0.571038	0.0104849	0.198982	0.322926	0.2249	0.194281	0.526152
mercaptopurine	0.251701	0.24625	0.170317	0.183952	0.129432	0.0527682	0.0870159	-0.0119727	-0.0399115	-0.0991446	-0.133699	-0.0195067	0.138001	-0.00056476	0.0589769	0.541392	0.68431	1	-0.079757	0.100024	0.264913	0.359547	-0.0730213	0.101209	0.08356	0.292765	0.176834	0.307413	0.203727	0.21534	0.290009	0.291878	0.266086	0.366055	0.277602	0.256508	0.297421	0.233108	0.331445	0.284076	0.245203	0.294365	0.416584	-0.189773	0.16778	0.0575752	0.198264	0.0254124	0.104672
EPZ-6438	-0.0679391	-0.116209	-0.02459	-0.0259307	-0.0707061	-0.0397743	-0.208316	-0.0189914	-0.00799975	0.205522	0.136919	-0.0462849	-0.118335	-0.0592135	-0.0821664	0.399219	0.165225	-0.079757	1	0.361497	0.081637	0.13463	0.0258373	0.0673722	-0.0189723	-0.0910359	-0.0590281	0.063267	0.0837396	0.0136163	0.107636	0.0583037	0.12395	0.120553	0.0623501	0.113787	0.0491217	0.0843769	0.219539	0.117128	0.0904882	0.159104	0.119533	0.252071	0.144674	0.205087	0.193181	0.101764	0.151
GSK-126	0.235499	0.382739	0.416623	0.21497	0.171991	0.071869	0.18417	0.237459	0.105967	0.151542	0.176588	-0.0244542	0.114584	0.0251202	-0.0666684	0.12165	0.214156	0.100024	0.361497	1	0.264004	0.11274	0.0752691	0.324216	0.256283	0.199864	0.150032	0.102249	0.386139	0.24549	0.0942127	0.204525	0.384856	0.465754	0.357568	0.424879	0.258193	0.277416	0.498905	0.381589	0.28212	0.43361	0.347381	0.239904	0.135761	0.230476	0.336338	0.104563	0.286427
bortezomib	-0.114529	0.166166	0.235611	0.041645	-0.0139224	0.135064	0.230913	0.31646	0.0675293	0.261513	0.143339	-0.24273	0.0958869	0.000699706	-0.00415141	0.185931	0.218193	0.264913	0.081637	0.264004	1	0.289532	0.2072	0.168406	0.183278	0.113661	0.204879	0.077395	-0.0465349	-0.119538	0.0737379	0.0836507	0.115662	0.229196	0.216991	0.12977	0.0649843	-0.0839519	0.10162	0.105636	0.141153	0.272587	0.123853	0.0539231	0.00191469	0.0267504	0.113494	0.130158	0.233331
methotrexate	0.11841	0.211449	0.210645	0.140093	-0.176686	0.146835	-0.0430288	0.0877538	0.100942	0.0447703	0.00256434	0.0211108	0.0686958	0.113028	0.114191	0.229863	0.148365	0.359547	0.13463	0.11274	0.289532	1	-0.0617162	0.0954171	-0.176756	0.10392	0.299462	0.203296	0.0582166	0.0761416	0.118837	-0.0265906	0.121497	0.169971	0.183913	0.107054	0.136963	0.224306	0.226146	0.249108	0.25285	0.195371	0.138026	-0.0476039	0.202703	0.121361	0.149981	0.170375	0.109896
NVP-ADW742	-0.179844	-0.182806	-0.1409	0.0109809	-0.00182534	0.0718078	0.245213	0.109592	-0.213981	0.0727322	-0.204519	-0.0364123	0.275517	-0.0296843	0.0586217	-0.0134474	-0.0250387	-0.0730213	0.0258373	0.0752691	0.2072	-0.0617162	1	0.559365	0.563104	0.296529	0.206735	0.164191	0.241277	0.190924	0.09217	0.0214955	-0.113578	0.0359243	-0.0174662	-0.0012907	-0.0527903	0.0209852	0.136122	0.163829	0.189806	0.200207	0.139784	0.0634757	0.0451818	0.30833	0.266896	0.226404	0.301417
ceritinib	0.303106	0.205788	0.366235	0.732713	0.566315	0.501188	0.578281	0.421409	0.20533	0.174867	0.086101	0.0646336	0.371271	0.11293	0.459334	0.259183	0.350419	0.101209	0.0673722	0.324216	0.168406	0.0954171	0.559365	1	0.85956	0.477551	0.393773	0.342891	0.515391	0.43227	0.121971	0.321173	0.353986	0.339354	0.155643	0.17168	0.127042	0.283225	0.523148	0.37269	0.424886	0.34528	0.573673	0.137883	0.296506	0.482315	0.465491	0.189568	0.630033
GSK-1838705A	0.21106	0.264125	0.294808	0.613112	0.584765	0.501638	0.563729	0.37173	0.0926224	0.164783	0.0773481	0.0832217	0.379433	0.152256	0.441598	0.237659	0.286405	0.08356	-0.0189723	0.256283	0.183278	-0.176756	0.563104	0.85956	1	0.432335	0.231827	0.220997	0.432135	0.322057	0.147992	0.390596	0.274339	0.275475	0.102955	0.110217	0.0595452	0.174302	0.380356	0.254917	0.282426	0.279464	0.52538	0.0969873	0.258949	0.376824	0.373843	0.137298	0.543649
busulfan	0.167356	0.0224032	0.129064	0.333114	0.247907	0.313707	0.331237	0.234344	0.0532621	0.124187	0.0568533	-0.123804	0.011857	0.18036	0.309012	0.16925	0.257551	0.292765	-0.0910359	0.199864	0.113661	0.10392	0.296529	0.477551	0.432335	1	0.397658	0.547588	0.42111	0.429393	0.39466	0.39649	0.246487	0.222313	0.234061	0.247692	0.226263	0.191232	0.276958	0.262211	0.33046	0.168588	0.353903	0.0297053	0.264411	0.160303	0.287027	0.279794	0.347188
MK-5108	0.167588	0.10319	0.290515	0.248618	0.132351	-0.013819	0.14282	0.207686	0.0955201	0.153931	0.0575581	-0.00968819	0.0283531	-0.00822791	0.262597	0.190856	0.309334	0.176834	-0.0590281	0.150032	0.204879	0.299462	0.206735	0.393773	0.231827	0.397658	1	0.556516	0.26839	0.187057	0.323001	0.341835	0.235021	0.23506	0.271427	0.13728	0.116397	0.233116	0.357174	0.295614	0.377375	0.362084	0.284582	0.0235227	0.114891	0.365681	0.113618	0.350388	0.421722
MLN-8054	0.221461	0.086613	0.0412564	0.286975	0.223264	0.157393	0.366277	0.273656	0.0818014	0.113329	0.00231273	0.0546344	-0.00126181	-0.0198122	0.290246	0.244286	0.272913	0.307413	0.063267	0.102249	0.077395	0.203296	0.164191	0.342891	0.220997	0.547588	0.556516	1	0.228875	0.297166	0.387598	0.352504	0.218754	0.0987017	0.0456089	0.153481	0.158991	0.349388	0.403164	0.229741	0.393232	0.225157	0.365627	0.162412	0.436838	0.351701	0.403329	0.310751	0.342494
I-BET-762	0.370215	0.0952112	0.341207	0.334106	0.337319	0.2019	0.140771	0.200795	0.423026	0.321256	0.258634	-0.0537225	0.14028	0.265072	0.103731	0.377447	0.375791	0.203727	0.0837396	0.386139	-0.0465349	0.0582166	0.241277	0.515391	0.432135	0.42111	0.26839	0.228875	1	0.829542	0.424216	0.522904	0.299677	0.455912	0.325494	0.280823	0.301509	0.267717	0.445943	0.460444	0.345389	0.317886	0.389104	-0.111555	0.128578	0.225814	0.313524	0.351326	0.426443
JQ1	0.455453	0.0614004	0.318638	0.288813	0.309702	0.134505	0.323004	0.36597	0.377179	0.26463	0.19067	0.0336322	0.182901	0.188197	0.0968409	0.511249	0.454925	0.21534	0.0136163	0.24549	-0.119538	0.0761416	0.190924	0.43227	0.322057	0.429393	0.187057	0.297166	0.829542	1	0.461382	0.457623	0.0851484	0.190916	0.202996	0.111321	0.144941	0.350244	0.415068	0.320957	0.346627	0.325049	0.324914	0.0083126	0.241191	0.303874	0.357047	0.426692	0.421848
navitoclax	0.34034	0.187526	0.278895	0.00524756	-0.0870056	0.0943166	0.037791	0.200792	0.229176	0.253489	0.259214	-0.0577013	-0.0286943	0.43549	0.235345	0.347364	0.243434	0.290009	0.107636	0.0942127	0.0737379	0.118837	0.09217	0.121971	0.147992	0.39466	0.323001	0.387598	0.424216	0.461382	1	0.723253	0.086689	0.164663	0.13982	-0.00523232	0.0841528	0.176731	0.138616	0.0926828	0.21632	0.343324	0.187826	-0.193201	0.19449	0.163857	0.145265	0.525328	0.249446
ABT-737	0.384432	0.162836	0.34678	0.439081	0.39003	0.316623	0.175748	0.311073	0.325473	0.204855	0.199341	-0.14766	0.0196356	0.46897	0.424599	0.306342	0.320424	0.291878	0.0583037	0.204525	0.0836507	-0.0265906	0.0214955	0.321173	0.390596	0.39649	0.341835	0.352504	0.522904	0.457623	0.723253	1	0.272317	0.249065	0.0335186	0.00134931	0.0233315	0.182008	0.20089	0.208707	0.281118	0.315164	0.284118	-0.0431265	0.194666	0.143115	0.189406	0.454683	0.481007
AT-7519	0.280385	0.344548	0.334854	0.383284	0.274817	0.456282	0.28669	0.268434	0.338216	0.130743	0.279154	0.0420062	0.144798	-0.0260917	0.20001	0.101408	0.377374	0.266086	0.12395	0.384856	0.115662	0.121497	-0.113578	0.353986	0.274339	0.246487	0.235021	0.218754	0.299677	0.0851484	0.086689	0.272317	1	0.810176	0.598136	0.747549	0.748546	0.443715	0.670834	0.697021	0.598369	0.496746	0.724927	0.0839166	0.173817	0.358408	0.291629	0.124525	0.446906
vincristine	0.325641	0.325672	0.360922	0.238374	0.186706	0.39441	0.190828	0.20362	0.264981	0.120758	0.262103	-0.0736904	0.073575	0.00519614	0.0182995	0.221415	0.350025	0.366055	0.120553	0.465754	0.229196	0.169971	0.0359243	0.339354	0.275475	0.222313	0.23506	0.0987017	0.455912	0.190916	0.164663	0.249065	0.810176	1	0.718755	0.731373	0.752919	0.455447	0.682897	0.748631	0.563694	0.596567	0.67381	-0.0489477	0.164315	0.302104	0.390754	0.263763	0.406376
ICG-001	0.257372	0.246374	0.243048	0.0270568	-0.00249515	0.129981	0.250146	0.118115	0.17576	0.194347	0.284163	0.120029	0.135423	0.0292219	-0.0789241	0.215344	0.32192	0.277602	0.0623501	0.357568	0.216991	0.183913	-0.0174662	0.155643	0.102955	0.234061	0.271427	0.0456089	0.325494	0.202996	0.13982	0.0335186	0.598136	0.718755	1	0.796468	0.688934	0.299526	0.500968	0.5458	0.419065	0.473927	0.495748	-0.00669313	0.252245	0.203218	0.276608	0.272399	0.327151
docetaxel	0.120385	0.125134	0.0350729	0.0285804	-0.0181274	0.20654	0.233726	0.090842	0.0232662	-0.041329	0.0150198	-0.0464434	0.0137415	-0.0605392	-0.0778799	0.123856	0.249948	0.256508	0.113787	0.424879	0.12977	0.107054	-0.0012907	0.17168	0.110217	0.247692	0.13728	0.153481	0.280823	0.111321	-0.00523232	0.00134931	0.747549	0.731373	0.796468	1	0.952406	0.425068	0.586335	0.657732	0.48953	0.413814	0.523439	0.0911	0.27487	0.129367	0.340534	0.104573	0.242595
paclitaxel	0.243304	0.202053	0.0568348	0.0353918	-0.0189773	0.243458	0.352029	0.0763412	0.0259396	-0.080694	-0.0008863	0.027782	-0.00268207	-0.00755525	-0.0994955	0.161216	0.182508	0.297421	0.0491217	0.258193	0.0649843	0.136963	-0.0527903	0.127042	0.0595452	0.226263	0.116397	0.158991	0.301509	0.144941	0.0841528	0.0233315	0.748546	0.752919	0.688934	0.952406	1	0.482153	0.617077	0.718054	0.529422	0.417803	0.507983	-0.00756717	0.307124	0.162406	0.341463	0.128646	0.245984
GSK-461364	0.363422	0.215954	0.187073	0.172332	0.144133	0.157939	0.201488	0.283817	0.195841	-0.0501201	-0.0116221	0.276015	0.229802	-0.0343721	0.027617	0.359398	0.357014	0.233108	0.0843769	0.277416	-0.0839519	0.224306	0.0209852	0.283225	0.174302	0.191232	0.233116	0.349388	0.267717	0.350244	0.176731	0.182008	0.443715	0.455447	0.299526	0.425068	0.482153	1	0.763561	0.749362	0.841769	0.604643	0.523817	0.22992	0.344968	0.512702	0.526671	0.190297	0.335483
vinflunine	0.402459	0.344857	0.309242	0.354157	0.327149	0.31833	0.339124	0.416657	0.265309	0.0737253	0.150829	0.152858	0.205066	-0.0692825	0.102359	0.378025	0.481317	0.331445	0.219539	0.498905	0.10162	0.226146	0.136122	0.523148	0.380356	0.276958	0.357174	0.403164	0.445943	0.415068	0.138616	0.20089	0.670834	0.682897	0.500968	0.586335	0.617077	0.763561	1	0.832843	0.826352	0.74518	0.760265	0.228031	0.289888	0.62794	0.621829	0.334143	0.583193
BI-2536	0.281932	0.177312	0.202852	0.197465	0.154313	0.248234	0.187436	0.20499	0.214621	-0.0411045	0.0103416	0.0413512	0.129372	-0.00849752	0.0260398	0.180065	0.368262	0.284076	0.117128	0.381589	0.105636	0.249108	0.163829	0.37269	0.254917	0.262211	0.295614	0.229741	0.460444	0.320957	0.0926828	0.208707	0.697021	0.748631	0.5458	0.657732	0.718054	0.749362	0.832843	1	0.874052	0.709545	0.665038	-0.00741822	0.150311	0.485252	0.408057	0.259944	0.438061
volasertib	0.340486	0.212278	0.251813	0.237764	0.215666	0.287629	0.251142	0.382324	0.291479	0.0957683	0.0700313	0.136886	0.232512	0.0523951	0.167542	0.304248	0.440881	0.245203	0.0904882	0.28212	0.141153	0.25285	0.189806	0.424886	0.282426	0.33046	0.377375	0.393232	0.345389	0.346627	0.21632	0.281118	0.598369	0.563694	0.419065	0.48953	0.529422	0.841769	0.826352	0.874052	1	0.705546	0.645492	0.175567	0.267142	0.633527	0.518995	0.332305	0.54111
carfilzomib	0.266425	0.272059	0.303639	0.121295	0.0266482	0.138789	0.218218	0.416501	0.227056	0.0276146	0.0737922	0.0627911	0.108232	0.0268096	0.105171	0.284017	0.476748	0.294365	0.159104	0.43361	0.272587	0.195371	0.200207	0.34528	0.279464	0.168588	0.362084	0.225157	0.317886	0.325049	0.343324	0.315164	0.496746	0.596567	0.473927	0.413814	0.417803	0.604643	0.74518	0.709545	0.705546	1	0.716796	0.170468	0.256054	0.568822	0.406317	0.489406	0.459621
dinaciclib	0.391428	0.365811	0.344541	0.470327	0.374223	0.454956	0.41053	0.435429	0.326465	0.183374	0.210109	0.232494	0.302227	0.0396346	0.377712	0.260768	0.571038	0.416584	0.119533	0.347381	0.123853	0.138026	0.139784	0.573673	0.52538	0.353903	0.284582	0.365627	0.389104	0.324914	0.187826	0.284118	0.724927	0.67381	0.495748	0.523439	0.507983	0.523817	0.760265	0.665038	0.645492	0.716796	1	0.0774938	0.397699	0.570228	0.421147	0.320009	0.51909
epothiloneB	0.00647151	0.0431575	0.0372549	0.108411	0.13788	0.0997434	0.282367	0.5489	0.296034	0.264761	0.156829	0.241359	0.291968	-0.122979	0.18577	0.162212	0.0104849	-0.189773	0.252071	0.239904	0.0539231	-0.0476039	0.0634757	0.137883	0.0969873	0.0297053	0.0235227	0.162412	-0.111555	0.0083126	-0.193201	-0.0431265	0.0839166	-0.0489477	-0.00669313	0.0911	-0.00756717	0.22992	0.228031	-0.00741822	0.175567	0.170468	0.0774938	1	0.437837	0.344936	0.552224	0.290192	0.353519
BIIB-021	0.275037	0.196566	0.133914	0.31579	0.237292	0.358234	0.464824	0.476293	0.246241	0.289941	0.273361	0.141652	0.0493056	0.051343	0.38074	0.331631	0.198982	0.16778	0.144674	0.135761	0.00191469	0.202703	0.0451818	0.296506	0.258949	0.264411	0.114891	0.436838	0.128578	0.241191	0.19449	0.194666	0.173817	0.164315	0.252245	0.27487	0.307124	0.344968	0.289888	0.150311	0.267142	0.256054	0.397699	0.437837	1	0.456206	0.568932	0.527477	0.339705
KU-60019	0.496086	0.389115	0.485507	0.237302	0.209218	0.22945	0.453024	0.530504	0.281122	0.250534	0.158849	0.422765	0.290481	-0.0396626	0.344634	0.32861	0.322926	0.0575752	0.205087	0.230476	0.0267504	0.121361	0.30833	0.482315	0.376824	0.160303	0.365681	0.351701	0.225814	0.303874	0.163857	0.143115	0.358408	0.302104	0.203218	0.129367	0.162406	0.512702	0.62794	0.485252	0.633527	0.568822	0.570228	0.344936	0.456206	1	0.614039	0.443973	0.560933
TH-588	0.307108	0.243576	0.254945	0.27181	0.278417	0.414058	0.445878	0.519375	0.160828	0.212973	0.117799	0.138089	0.161979	0.0222614	0.239876	0.312184	0.2249	0.198264	0.193181	0.336338	0.113494	0.149981	0.266896	0.465491	0.373843	0.287027	0.113618	0.403329	0.313524	0.357047	0.145265	0.189406	0.291629	0.390754	0.276608	0.340534	0.341463	0.526671	0.621829	0.408057	0.518995	0.406317	0.421147	0.552224	0.568932	0.614039	1	0.48825	0.514593
cytarabine	0.357534	0.110349	0.226701	0.0701601	0.062949	0.277909	0.275589	0.584762	0.36729	0.391301	0.344334	0.0795278	0.013759	0.252972	0.27879	0.358721	0.194281	0.0254124	0.101764	0.104563	0.130158	0.170375	0.226404	0.189568	0.137298	0.279794	0.350388	0.310751	0.351326	0.426692	0.525328	0.454683	0.124525	0.263763	0.272399	0.104573	0.128646	0.190297	0.334143	0.259944	0.332305	0.489406	0.320009	0.290192	0.527477	0.443973	0.48825	1	0.597985
crizotinib	0.537873	0.316671	0.455123	0.578126	0.614326	0.541026	0.603334	0.698959	0.370664	0.353626	0.275289	0.0326809	0.276076	0.170921	0.366079	0.566581	0.526152	0.104672	0.151	0.286427	0.233331	0.109896	0.301417	0.630033	0.543649	0.347188	0.421722	0.342494	0.426443	0.421848	0.249446	0.481007	0.446906	0.406376	0.327151	0.242595	0.245984	0.335483	0.583193	0.438061	0.54111	0.459621	0.51909	0.353519	0.339705	0.560933	0.514593	0.597985	1
danusertib	0.200811	0.129732	0.260323	0.183907	0.191167	0.378056	0.343386	0.423539	0.117724	0.242216	0.168556	-0.0413521	0.0204604	0.0598175	0.174551	0.324952	0.266167	0.0734116	0.26673	0.36269	0.15472	0.10518	0.296999	0.367658	0.273916	0.33583	0.303459	0.224026	0.417442	0.32011	0.267716	0.345293	0.525857	0.51479	0.39054	0.446142	0.462506	0.216962	0.512001	0.476253	0.438342	0.449702	0.423964	0.248483	0.229476	0.46374	0.553507	0.647179	0.72151
BLU-9931	0.2067	0.167451	0.210675	0.202164	0.176997	0.114132	0.0658131	0.215023	0.109337	0.0280913	0.0860476	-0.0330202	0.00822899	0.0278149	0.104925	0.197649	0.125171	-0.145492	0.221979	0.301525	-0.0765385	-0.0244295	0.182654	0.389167	0.334004	0.0310134	0.366935	-0.0174643	0.316464	0.126424	0.0363259	0.101503	0.21275	0.44209	0.192404	0.218681	0.246081	0.152295	0.373278	0.292905	0.158049	0.363399	0.305335	0.132307	0.148872	0.311531	0.315174	0.316973	0.325703
olaparib	0.273961	0.150611	0.266738	0.340184	0.17103	0.225401	0.365415	0.412352	0.309434	0.2577	0.168444	0.104801	0.204056	0.0299973	0.166329	0.287521	0.33812	0.0497666	0.317405	0.440883	0.0627286	0.191208	0.205525	0.528004	0.353793	0.278456	0.382118	0.26484	0.509427	0.500478	0.248737	0.303574	0.467157	0.509751	0.4687	0.405558	0.394632	0.353496	0.542318	0.478472	0.483976	0.569721	0.53882	0.219871	0.28524	0.428007	0.408557	0.495145	0.547873
entinostat	0.480742	0.13903	0.270918	0.451637	0.487453	0.345196	0.464571	0.519371	0.288824	0.224742	0.172304	0.164588	0.0662631	0.0409939	0.439283	0.241542	0.300317	-0.142404	0.17907	0.092233	-0.10308	-0.166822	0.00642731	0.41344	0.39888	0.102964	0.310123	0.282402	0.18772	0.246763	0.112413	0.377643	0.234637	0.11435	0.0943495	0.0642217	0.0217246	0.203017	0.358922	0.162963	0.31322	0.355022	0.431172	0.389779	0.394957	0.53416	0.363084	0.442107	0.607865
panobinostat-	0.38941	0.280776	0.335902	0.336795	0.380667	0.269404	0.405746	0.582079	0.450086	0.271679	0.264958	0.0635686	0.170602	0.0136483	0.247183	0.227988	0.337692	-0.024846	0.210134	0.348337	0.0848188	-0.0584049	0.0794477	0.427559	0.399807	0.12598	0.333485	0.23785	0.323193	0.309438	0.170647	0.408148	0.507379	0.408286	0.283322	0.26698	0.230158	0.403076	0.615072	0.512234	0.615752	0.632218	0.57303	0.390965	0.297898	0.588494	0.389383	0.470943	0.657296
vorinostat	0.321794	0.172588	0.274572	0.397177	0.431863	0.303187	0.412739	0.519452	0.342102	0.284657	0.204793	-0.0235443	0.0765113	0.0475056	0.322338	0.321922	0.33133	0.0722824	0.199985	0.342512	0.156975	0.00506234	0.271187	0.576179	0.535296	0.258744	0.464577	0.317194	0.412633	0.35395	0.220963	0.470539	0.428632	0.433009	0.325114	0.2697	0.224516	0.377544	0.604647	0.49655	0.595931	0.615597	0.549304	0.384053	0.396629	0.554472	0.513214	0.544061	0.693871
actinomycin-D	0.206655	0.133354	0.202391	0.257789	0.231944	0.284968	0.346323	0.408717	0.123488	-0.0250325	-0.0145118	-0.0353387	0.205207	0.0388022	0.237477	0.2706	0.496861	0.293647	0.140941	0.29647	0.18215	0.154317	0.135679	0.405974	0.349282	0.399228	0.203069	0.150457	0.264161	0.334199	0.10228	0.153299	0.571908	0.472741	0.518873	0.579066	0.520063	0.328205	0.594943	0.519386	0.467643	0.560691	0.636082	0.217356	0.0910106	0.336533	0.289688	0.290505	0.546506
PHA-793887	0.111758	0.0668597	0.10986	0.345133	0.301648	0.276142	0.347403	0.224605	0.101914	0.084845	0.143265	0.091134	0.25194	-0.0208958	0.195053	0.136563	0.391205	0.213179	0.00959831	0.242574	0.0997776	-0.0744564	0.281152	0.556742	0.550926	0.261883	0.251195	0.0519169	0.33701	0.204069	0.0263072	0.178332	0.584218	0.562555	0.560987	0.530753	0.474086	0.161909	0.549535	0.451156	0.321347	0.471307	0.659687	0.0686711	0.0946075	0.27527	0.245115	0.218183	0.493559
palbociclib	0.0287844	0.0407514	0.0981362	0.0821077	0.0176674	0.145561	0.185179	0.301339	0.124244	0.280211	0.235204	0.0650905	0.132826	0.171693	0.218744	0.108621	0.251947	0.140518	0.164231	0.306824	0.283733	0.19958	0.208893	0.210167	0.181162	0.392968	0.294296	0.313867	0.256718	0.250712	0.236846	0.138332	0.138584	0.153804	0.13368	0.164133	0.0982034	-0.0799184	0.243273	0.157443	0.0953258	0.243894	0.372738	-0.030241	0.0956697	0.185305	0.0329653	0.425094	0.305255
fluorouracil	0.237951	0.146426	0.239142	0.295727	0.207963	0.172964	0.294914	0.279144	0.139909	-0.07876	-0.0702427	0.331435	0.148708	-0.150845	0.304097	-0.0475585	0.246753	0.0767313	-0.0192366	0.163233	-0.0300772	0.040107	-0.0917999	0.255226	0.183585	0.229549	0.214042	0.0744749	0.0290359	0.0835742	-0.31626	-0.146491	0.279654	0.112335	0.204426	0.235197	0.226763	0.147401	0.320267	0.276819	0.218236	0.22985	0.361001	0.227041	0.204189	0.387409	0.172752	0.0283024	0.16914
nutlin3a	0.342268	0.238835	0.343308	0.480982	0.357375	0.30702	0.437781	0.512311	0.391137	0.190555	0.15009	0.176141	0.291643	0.265215	0.5864	0.020385	0.213394	-0.109554	-0.0690464	0.0396403	-0.0563776	0.0448969	0.0453595	0.418166	0.301005	0.402372	0.33014	0.343138	0.16724	0.260266	0.119997	0.229481	0.317243	0.0537452	0.142274	0.101072	0.0964202	0.059767	0.280874	0.1797	0.272251	0.179111	0.394365	0.22381	0.170096	0.396577	0.0778844	0.337357	0.557105
mubritinib	0.264583	-0.0194935	0.0649913	0.112944	0.17364	0.224295	0.0751462	0.16596	-0.0306481	-0.10847	-0.251871	-0.10693	-0.241347	0.18206	0.227912	0.290794	0.160721	0.122567	0.158973	0.0312153	-0.15964	0.0661604	-0.0023308	0.106507	0.0487148	0.169999	-0.101346	0.139646	0.208269	0.206721	0.162158	0.185829	0.0276467	-0.0233806	-0.0369549	0.117839	0.157542	0.0722324	0.149344	0.0671166	0.10394	0.0576603	0.102558	0.0925142	0.248859	0.205514	0.350933	0.240945	0.250767
tozasertib	0.00805767	-0.0554673	0.108514	0.191082	0.184602	0.136007	0.235021	0.328974	0.145066	0.158805	0.0298603	-0.0498196	0.118547	0.1477	0.258161	0.121961	0.231233	-0.0613396	0.230926	0.383303	0.134203	-0.0247196	0.222569	0.378592	0.336925	0.356661	0.381513	0.31951	0.344186	0.212956	0.167142	0.316064	0.509876	0.319388	0.281236	0.471439	0.409138	0.272573	0.445258	0.434359	0.406562	0.380381	0.419107	0.198546	0.0393192	0.267902	0.139364	0.250726	0.560579
AMG-900	0.0633076	-0.0780491	-0.0112909	0.0192431	0.0828561	0.13974	0.0697465	0.277472	0.266276	0.141863	0.0587639	-0.0384976	0.121244	-0.0361615	0.0277571	0.199856	0.229549	0.0550661	0.248447	0.156179	0.0312362	0.0388962	0.149502	0.137911	0.0883104	0.304489	0.0652618	0.274333	0.282435	0.226482	0.102258	0.136787	0.444599	0.291372	0.332862	0.471203	0.449975	0.327617	0.413552	0.430058	0.450693	0.264966	0.281528	0.349528	0.220574	0.328449	0.307236	0.310365	0.426111
GSK-1070916	0.0734569	0.189542	0.105676	0.136038	0.12081	0.191724	0.0641178	0.17685	0.121459	-0.145763	-0.0823873	0.0409759	0.0872833	-0.00376537	0.14294	0.117462	0.131188	0.177249	0.270169	0.342038	0.0330333	0.202278	-0.000445847	0.181123	0.140961	0.232854	0.0968252	0.326819	0.178137	0.0635988	-0.0279314	0.119188	0.578828	0.481932	0.357418	0.533332	0.556137	0.483982	0.600427	0.620866	0.570093	0.423948	0.41153	0.303565	0.284171	0.370119	0.447949	0.230701	0.344256
gemcitabine	0.157017	0.281388	0.402117	0.10991	0.0185472	0.27915	0.383931	0.584354	0.312281	0.444069	0.354517	0.155033	0.237392	0.0991095	0.264569	0.210279	0.198951	-0.065782	0.173178	0.10384	0.30565	0.205389	-0.0326658	0.11345	0.159541	-0.00943065	0.261233	0.0744124	0.00846372	0.0867422	0.0639467	0.0852314	0.126942	0.0827437	0.161311	0.0405451	-0.00909743	-0.0506507	0.0718301	-0.0371253	-0.00461355	0.202657	0.208566	0.360269	0.244041	0.187128	0.131651	0.37696	0.371302
MPI-0479605	0.0367894	0.19264	0.190559	-0.0221287	-0.126991	0.190606	0.479638	0.433961	-0.0267976	-0.0451291	-0.158713	0.103766	0.0161791	0.0719604	0.0696822	0.120306	0.184783	0.0307044	0.0659295	0.0591175	0.19324	0.0801949	0.0286989	0.0289848	-0.000312259	0.164503	0.249552	0.319991	-0.111888	-0.00874275	0.0591678	0.0519852	0.206271	0.0968129	0.325115	0.369239	0.473538	0.121271	0.0955187	0.155365	0.148995	0.127447	0.134534	0.127841	0.397942	0.163701	0.300147	0.218896	0.234681
NMS-P715	0.183675	0.281801	0.301473	0.099767	0.0580315	0.248304	0.531449	0.506605	0.0597817	0.0327908	-0.0715131	0.164519	0.0848073	0.125399	0.269216	0.308121	0.333711	0.160737	-0.0790914	0.0161368	0.143106	0.0106071	0.0222502	0.157463	0.211468	0.243361	0.232389	0.295745	-0.00200433	0.151682	0.14977	0.101257	0.150473	0.0700235	0.394108	0.397056	0.455806	0.146064	0.0458515	0.0310979	0.109633	0.112926	0.195729	0.142083	0.476929	0.226559	0.290914	0.25921	0.336384
SN-38	0.229232	0.161257	0.274569	0.276369	0.133691	0.152021	0.262172	0.380978	0.360946	0.241115	0.244129	0.129861	0.187879	0.00297731	0.116692	0.402989	0.513092	0.35992	0.265604	0.343856	0.107757	0.366325	0.0156645	0.371397	0.250744	0.285224	0.384375	0.305732	0.555513	0.592195	0.164817	0.231628	0.437094	0.466271	0.473877	0.380006	0.284918	0.31966	0.522599	0.431541	0.374728	0.547521	0.547945	0.225688	0.358704	0.344283	0.266324	0.464289	0.457184
irinotecan	0.26574	0.19239	0.225613	0.35343	0.234202	0.43049	0.371501	0.546431	0.291199	0.192205	0.189331	0.16215	0.167756	0.0597949	0.285979	0.435565	0.476335	0.299874	0.289383	0.327831	0.0813117	0.291109	0.0664484	0.404819	0.356328	0.352672	0.219967	0.370659	0.37956	0.424432	0.220412	0.276457	0.476805	0.48813	0.42876	0.446683	0.325464	0.427794	0.574417	0.452372	0.466688	0.622468	0.691241	0.386055	0.555528	0.47489	0.489271	0.593228	0.580165
topotecan	0.209672	0.115501	0.174946	0.260062	0.123166	0.294081	0.185244	0.469678	0.23417	-0.0110811	0.000967747	0.213547	0.214519	0.0469708	0.316508	0.417037	0.382584	0.271961	0.255465	0.195914	0.0386048	0.385892	0.0122998	0.309502	0.215329	0.263354	0.247286	0.300745	0.210365	0.352567	0.200761	0.163293	0.321579	0.334693	0.329665	0.301933	0.223688	0.419849	0.473331	0.357892	0.406162	0.547246	0.536384	0.413531	0.426018	0.408207	0.327777	0.495638	0.445846
doxorubicin	0.185714	0.201381	0.301168	0.220063	0.125261	0.265122	0.308199	0.437301	0.289097	0.116564	0.153604	0.0912777	0.121973	-0.0270952	0.154613	0.298719	0.468522	0.303344	0.122628	0.349302	0.286321	0.232968	-0.0142633	0.334881	0.242256	0.410312	0.337349	0.303363	0.330556	0.337035	0.135392	0.131156	0.602278	0.581407	0.650288	0.679286	0.494794	0.320874	0.528035	0.475585	0.446143	0.483771	0.583186	0.270133	0.368634	0.292095	0.358396	0.404172	0.455943
epirubicin	0.244789	0.205573	0.226692	0.230789	0.172118	0.264693	0.358884	0.344064	0.302453	0.149421	0.238141	0.0426624	0.0906411	-0.00263861	0.0594813	0.218944	0.377325	0.244714	0.0953322	0.350644	0.190371	0.222007	0.0173133	0.269701	0.173617	0.362268	0.348717	0.343467	0.379618	0.29703	0.161955	0.195308	0.663948	0.630542	0.666957	0.682351	0.56157	0.310126	0.557261	0.553339	0.420028	0.475282	0.577835	0.15203	0.382719	0.256474	0.246643	0.422502	0.511053
mitoxantrone	0.259887	0.260537	0.379182	0.218086	0.155735	0.196994	0.325064	0.557778	0.328975	0.168242	0.172406	-0.0258339	0.183798	-0.0443263	0.181685	0.304909	0.366725	0.163702	0.166722	0.235768	0.283602	0.32546	0.0377185	0.270066	0.179685	0.328288	0.423134	0.447858	0.300067	0.384755	0.276585	0.312087	0.38775	0.320941	0.403219	0.328928	0.299496	0.283686	0.493945	0.37928	0.421142	0.525457	0.429925	0.380404	0.418734	0.437409	0.387105	0.6386	0.579559
daunorubicin	0.459561	0.321593	0.464188	0.288241	0.245925	0.312595	0.370503	0.643991	0.507532	0.252097	0.309531	0.0920721	0.259516	0.0356908	0.241739	0.370511	0.528129	0.14028	0.149268	0.313534	0.131172	0.158413	-0.104976	0.317305	0.198193	0.293957	0.395405	0.332517	0.34423	0.438057	0.268697	0.339685	0.574659	0.499494	0.519796	0.465417	0.426216	0.444583	0.61566	0.488976	0.59776	0.599658	0.600406	0.383622	0.329335	0.511486	0.363169	0.547623	0.649967
etoposide	0.434515	0.325174	0.441303	0.322694	0.244026	0.391868	0.432249	0.613689	0.395894	0.250392	0.200427	0.149754	0.243215	0.141374	0.435319	0.369946	0.42023	0.179084	0.138161	0.288282	0.0923999	0.213306	0.0564419	0.40521	0.334147	0.460561	0.434682	0.538075	0.414678	0.44474	0.346095	0.412967	0.446526	0.398976	0.399672	0.390692	0.350955	0.329234	0.49092	0.362661	0.457681	0.46942	0.56324	0.410884	0.552123	0.506942	0.499701	0.625326	0.620059
MK-2206	0.204644	0.197773	0.236497	0.287088	0.183982	0.205808	0.145152	0.299711	0.247094	0.177664	0.236373	0.101875	0.135578	0.145039	0.379499	0.326626	0.353104	0.116651	0.228859	0.110198	0.0335935	0.138652	-0.271486	0.123404	0.174405	0.209328	0.212353	0.165686	0.00405037	0.108234	0.21757	0.327466	0.231226	-0.00733788	0.129507	0.0989856	0.0362386	0.105351	0.178798	-0.0154118	0.148911	0.163866	0.243662	0.376765	0.182021	0.21452	0.135168	0.211976	0.295032
cisplatin	0.178002	0.11881	0.0724858	0.244087	0.159836	0.218789	0.183482	0.340683	0.323791	0.391948	0.291837	0.244303	0.18158	0.180576	0.329593	0.361555	0.329891	0.175124	0.257621	0.0324765	0.0870274	0.228876	0.0671702	0.261586	0.223511	0.27332	0.306042	0.381861	0.258938	0.343278	0.377486	0.232959	0.138281	0.115149	0.28292	0.165063	0.201605	0.139921	0.288925	0.102932	0.285132	0.286533	0.378224	0.137894	0.340046	0.264708	0.283898	0.531851	0.337112
carboplatin	0.178552	0.147886	0.207128	0.308098	0.308098	0.321909	0.148524	0.363271	0.29919	0.268007	0.208712	0.069486	0.060043	0.276113	0.484735	0.32782	0.355595	0.17024	0.293561	0.160836	0.161171	0.375227	-0.0466261	0.258848	0.164981	0.248302	0.252042	0.338783	0.298638	0.317773	0.341769	0.352586	0.392869	0.264239	0.287858	0.281328	0.2007	0.032914	0.375998	0.261283	0.378002	0.342152	0.433313	0.22469	0.214485	0.311908	0.234041	0.455412	0.512768
melphalan	0.344343	0.251674	0.322657	0.291677	0.101532	0.425204	0.337422	0.613411	0.394215	0.279645	0.214251	0.0565573	0.141354	0.161392	0.37893	0.300011	0.299801	0.0375706	0.334751	0.267911	0.19629	0.303143	0.0193692	0.335524	0.19008	0.160254	0.250459	0.328658	0.223587	0.262433	0.285445	0.28784	0.298867	0.296783	0.159252	0.217995	0.187229	0.26627	0.434508	0.277744	0.40717	0.490519	0.435529	0.455194	0.434407	0.430215	0.525824	0.622873	0.536364
masitinib	0.39256	0.339263	0.400498	0.0364525	0.194838	0.036556	0.117998	0.193947	0.12792	-0.0900453	0.0921679	0.050934	0.0160479	0.0600925	-0.0537666	0.215216	0.152052	-0.0148053	0.0929182	0.187058	-0.318142	0.00860584	-0.148173	0.0273276	-0.0224909	-0.0700265	-0.00271992	0.00508408	0.353198	0.434548	0.13997	0.0932781	0.142586	0.154287	0.0129085	-0.0024091	0.0659384	0.198472	0.36102	0.251885	0.156727	0.264895	0.182297	-0.0267077	0.0490326	0.319456	0.165022	0.256327	0.274001
imatinib	0.328029	0.242585	0.265333	0.00389294	0.287351	-0.0515531	-0.0106837	0.0995047	0.0582405	-0.0769083	0.0728398	0.0630897	-0.00192059	0.00115423	-0.102959	0.24984	0.0938144	-0.0337836	-0.0264764	0.0756495	-0.350966	-0.00190861	-0.135553	-0.0405877	-0.0795041	-0.113579	0.0338194	-0.00422415	0.271771	0.36873	-0.0120305	-0.00876971	0.0448682	0.0649305	0.00349918	-0.0735925	-0.00915356	0.172893	0.284399	0.200224	0.142355	0.101928	0.0426587	-0.00389259	0.0183195	0.254294	0.12339	0.180933	0.291174
nilotinib	0.320744	0.166356	0.167148	0.0864729	0.392694	-0.0807017	0.0567353	0.2062	0.0633836	0.00659809	0.0890508	-0.025138	0.0249927	-0.0950044	-0.0655365	0.424159	0.272384	0.109016	-0.0747353	-0.0233476	-0.176837	0.017091	-0.109956	-0.0560131	-0.022034	-0.0460989	0.111338	0.0995381	0.101421	0.291054	-0.00217695	0.0385913	-0.0573907	-0.0490883	0.0679011	-0.107455	-0.08376	0.176808	0.230387	0.0763587	0.126321	0.120137	0.0280907	0.253918	0.237844	0.258665	0.196522	0.232099	0.357869
ponatinib	0.373743	0.347112	0.248381	0.0282058	0.321745	0.238113	0.244545	0.453798	0.164931	0.0148504	0.170835	0.0992117	0.014374	-0.0820015	-0.0666513	0.321782	0.0756353	-0.0373107	-0.136909	0.0458755	-0.0725142	0.0130952	-0.0616249	0.0206435	0.0457239	-0.0352946	-0.0305907	0.0593463	0.118492	0.271951	-0.0352703	-0.0656219	0.184558	0.206665	0.0705629	0.083736	0.139735	0.342518	0.417403	0.301038	0.296159	0.204607	0.179801	0.210192	0.208305	0.36856	0.371331	0.331128	0.436164
vatalanib	0.23122	0.216944	0.14199	0.126316	0.270081	0.0510579	0.23336	0.0354996	-0.063808	-0.247954	-0.00135913	0.129635	-0.0660896	-0.0405983	0.0342546	0.00639696	-0.0263344	-0.175409	-0.161291	0.0423921	-0.515484	-0.382836	-0.104903	0.0763076	0.195106	-0.0520267	-0.106416	0.0150148	0.189915	0.285543	0.117456	0.118938	0.0554002	-0.0244715	-0.226674	-0.159135	-0.0933544	0.113406	0.229718	0.0717556	-0.0139908	0.153959	0.163881	-0.0983423	0.0474662	0.239221	0.065885	0.0795109	0.07987
cabozantinib	0.173099	0.0783447	0.0691213	-0.0605508	0.0415832	0.0279039	0.200478	0.0769885	-0.0849551	-0.284729	-0.0420489	-0.00414217	-0.142144	-0.104833	-0.137021	0.00930092	-0.0899538	-0.227858	-0.0695421	0.0228085	-0.375473	-0.11753	0.0589843	0.0379695	0.0245721	0.0333192	-0.0519554	0.0510698	0.192321	0.316992	0.0879332	-0.0698273	0.0653721	0.0885936	-0.0409742	-0.00718088	0.0695036	0.219414	0.298818	0.261819	0.129536	0.255164	0.10872	-0.0660525	0.045028	0.281199	0.120308	0.213676	0.158541
axitinib	0.369053	0.228953	0.264087	0.221168	0.277832	0.226833	0.464014	0.358109	0.0913135	-0.133122	0.0159283	0.0387484	-0.00359189	-0.00909248	0.145659	0.167529	0.116653	-0.129094	0.091193	0.15948	-0.265454	0.0131046	0.0424249	0.227621	0.15156	0.195881	0.203798	0.283367	0.233686	0.302475	0.153644	0.196792	0.344417	0.234563	0.0817405	0.148062	0.212896	0.348942	0.484745	0.420228	0.364184	0.388218	0.313836	0.189668	0.264205	0.477526	0.318327	0.428012	0.543092
nintedanib	0.17257	0.237477	0.380193	0.192776	0.316017	0.266657	0.0851983	0.396755	0.157539	0.0137305	0.191113	-0.0206007	-0.0296147	0.019664	0.121811	0.103853	0.126827	-0.175152	0.279718	0.256875	-0.327289	-0.0824445	-0.00940027	0.167688	0.18126	0.0665506	0.0206907	0.0916758	0.274952	0.386898	0.0646205	0.182001	0.20848	0.160776	0.0521079	0.0724654	-0.177814	0.192445	0.331199	0.2193	0.144609	0.240457	0.231509	0.222076	0.24746	0.428669	0.310478	0.37323	0.435742
sorafenib	0.26701	0.14933	0.182709	0.0388764	0.0614505	0.126816	0.335287	0.186431	-0.179584	-0.235842	-0.18215	0.0551761	-0.176024	0.0854315	0.214291	0.182204	0.0102531	0.00421651	-0.0676304	-0.0614332	-0.301928	-0.00466966	0.193298	0.220238	0.280531	0.166995	0.086118	0.176374	0.225034	0.357721	0.246545	0.113969	-0.0799902	-0.0109271	-0.0529886	-0.0554279	0.0112417	0.112718	0.218472	0.122561	0.0330481	0.228788	0.191241	-0.0706035	0.326499	0.396815	0.277056	0.344203	0.199026
pazopanib	0.16609	0.172208	0.0644054	0.0645934	0.0086228	0.307203	0.219897	0.229581	0.00295098	-0.123817	0.063532	0.174156	-0.0730708	0.106222	0.209207	-0.122509	-0.241295	-0.329605	-0.0192218	-0.0115294	-0.387712	0.0257558	-0.087706	0.0457897	0.0815227	0.0296707	-0.08652	0.0297977	-0.0316709	0.0273163	0.0859133	0.0239135	0.146011	0.0492994	-0.138436	0.0420002	0.0726763	0.225453	0.22063	0.166968	0.119223	0.151506	0.159216	0.152274	0.33202	0.275551	0.223429	0.305389	0.149151
regorafenib	0.252878	0.327342	0.173972	0.00428908	0.0339559	0.205815	0.22536	0.278715	0.0337224	-0.0463603	0.0125646	0.304019	0.0492398	-0.0316452	0.0215277	0.0320113	-0.13621	-0.221163	-0.123401	-0.108461	-0.320133	0.0520342	0.158018	0.069752	0.107431	-0.171483	-0.161791	-0.0923205	0.0320621	0.127227	-0.076241	-0.149477	-0.0178405	0.0296504	-0.119781	-0.131746	-0.04909	0.156017	0.191538	0.14557	0.0754561	0.17871	0.154464	0.0750193	0.204765	0.410446	0.207984	0.329798	0.249968
afatinib	0.0789205	0.0326215	0.111547	0.00642541	-0.0626245	0.0471738	0.250771	0.1986	0.162855	0.0732197	0.0514152	-0.137957	-0.159455	-0.0985739	0.0121282	0.111996	0.167654	0.095493	-0.0756486	0.119207	0.148937	0.125762	-0.0625753	0.0655241	0.0185296	0.257815	0.000922969	0.191871	0.131365	0.290928	0.0555833	0.00679677	0.0935497	0.0412354	0.138018	0.213254	0.19953	0.227274	0.04646	0.164068	0.178698	0.0661546	0.116556	0.10431	0.257912	0.0947624	0.0230145	-0.00369515	-0.064715
ibrutinib	0.144955	0.00836097	0.0527027	-0.0270752	-0.0340002	-0.0438335	-0.0434506	-0.0732483	0.296604	0.151743	0.1609	-0.0572373	-0.174792	0.142443	0.128498	0.0993159	0.134944	0.0642522	-0.0566966	0.0184571	-0.0362114	0.0911208	-0.160546	0.000112101	-0.0265594	0.240039	0.0623867	0.272749	0.206965	0.179239	0.153424	0.0537145	0.0559437	0.0430447	0.0524172	0.0820537	0.0696001	0.284765	0.0528339	0.184394	0.246494	-0.081957	0.0726925	-0.197001	0.184383	0.10519	0.00015522	-0.114581	-0.186857
erlotinib	-0.000346162	-0.0552434	0.00167024	0.0739951	-0.00573212	0.0192167	0.200457	0.277291	0.257097	0.0225058	0.0483689	0.0540665	0.0969197	-0.12888	0.0240466	0.0697222	0.0172504	0.00219291	-0.0444617	0.0192305	0.0205209	0.203909	-0.286476	-0.0424617	-0.181918	-0.108402	-0.291263	-0.0562607	-0.0772334	0.149151	-0.252989	-0.160216	0.076171	-0.0610721	0.0749861	0.164704	0.128591	0.166161	0.0898536	0.0603715	0.0908748	0.04052	0.0390034	0.459985	0.354915	0.0230173	0.221712	-0.026971	-0.0145498
gefitinib	0.144031	0.0694471	0.176105	-0.00831087	-0.0365675	0.0232261	0.223457	0.199142	0.155248	-0.045542	0.0139663	0.0243026	-0.0303195	-0.0343635	-0.0186595	0.0726756	0.0932296	0.0726349	0.0574868	0.217521	0.100409	0.051201	-0.272793	-0.0738953	-0.0910368	-0.157154	-0.288779	-0.176956	-0.0473242	0.0931324	-0.185396	0.00926122	0.0870854	0.0356926	0.0994787	0.216477	0.168627	0.138315	0.0286907	0.0770895	0.0461204	0.0985877	0.0500287	0.219069	0.212551	0.0185459	0.0573464	-0.123066	-0.11007
pelitinib	0.359236	0.229667	0.242452	0.0530922	0.0339664	0.124177	0.271981	0.487385	0.468591	0.16892	0.185841	0.263941	0.0842533	-0.0152467	0.11294	0.0973866	0.163035	-0.0114927	0.0716975	0.140487	0.046405	0.062233	-0.32618	-0.0597538	-0.0848654	-0.159119	-0.164345	0.0430702	0.0127892	0.220774	-0.057393	0.0534376	0.0762426	0.0165513	0.0802621	0.101562	0.0759747	0.251801	0.17337	0.114591	0.209815	0.275511	0.245971	0.358317	0.373143	0.258395	0.201659	0.206144	0.0400117
lapatinib	0.257471	0.245521	0.245356	0.031858	-0.0199103	0.157952	0.199152	0.157401	0.175096	0.0135703	0.101615	0.00957048	-0.0602409	0.0338869	0.0375892	-0.026993	0.0578905	0.0658658	0.0568988	0.123991	0.0699294	0.176589	-0.292692	-0.0765137	-0.0165466	-0.110427	-0.224653	-0.115677	-0.0268583	0.0842268	-0.0924891	0.0100274	0.07054	0.0858237	0.107704	0.114449	0.117999	0.179192	0.0607994	0.170757	0.138231	0.166805	0.17493	-0.00149471	0.256663	0.0625541	0.0378336	-0.0580871	-0.171641
neratinib	0.275396	0.261538	0.225898	-0.0155885	-0.0528361	0.0855059	0.211324	0.311144	0.317457	0.0798051	0.150011	0.187251	0.0328243	-0.0662199	0.0199345	-0.00653141	0.101915	0.0509358	0.0135004	0.102726	0.0868315	0.114338	-0.285657	-0.106879	-0.0738655	-0.187007	-0.22181	-0.0952917	-0.0695444	0.106495	-0.121388	-0.0330635	0.0871785	0.0722278	0.158133	0.123698	0.124242	0.264197	0.14202	0.200345	0.22715	0.300343	0.226817	0.215766	0.381886	0.210539	0.154422	0.0949001	-0.10493
selumetinib	-0.243914	-0.162951	-0.192807	-0.114941	-0.0436054	0.237384	0.0898334	0.109536	-0.0817095	0.173387	-0.0175546	0.000122545	0.0817108	-0.0425663	-0.0296533	0.0184841	0.0161059	0.0131913	-0.137361	-0.110602	0.202979	0.0978353	0.395188	0.142764	0.164262	0.221066	-0.0209965	0.178668	0.156007	0.170876	-0.0736106	-0.168552	0.135688	0.119126	0.181203	0.32411	0.304148	0.144066	0.140969	0.244309	0.252352	0.0364138	0.161842	0.018592	0.1225	-0.00115089	0.191883	0.154972	0.185533
PD-0325901	-0.232744	-0.152791	-0.120779	-0.184266	-0.104474	0.0583366	-0.00277733	-0.0251759	-0.11123	0.186865	0.000753132	0.103422	0.0380062	-0.0269251	-0.0588598	0.00504859	-0.0541308	0.0142889	-0.0138544	-0.0141448	0.180602	0.0917005	0.262821	0.0225931	0.0262109	0.0764568	-0.220013	-0.0458591	0.0954579	0.117184	-0.211576	-0.310258	0.0316252	0.0509275	0.222124	0.269409	0.254682	-0.0402981	0.0392687	0.0891499	0.0362867	-0.082718	0.0699672	-0.0264937	0.0308057	0.0288603	0.131507	0.0426783	0.0306068
trametinib	-0.168823	0.0887767	0.0376033	-0.177726	-0.0750042	0.0640626	0.18798	0.0584898	-0.129602	0.159532	0.0306279	0.141841	0.222497	-0.226708	-0.265187	0.0129722	-0.0519556	-0.0407251	0.0168869	0.168132	0.28494	-0.0373116	0.185589	-0.0648049	0.0281247	-0.00126964	-0.249839	-0.0686082	-0.0520769	-0.0395066	-0.219645	-0.180812	0.20954	0.122196	0.28976	0.283551	0.314131	0.0576625	0.103228	0.136016	0.102848	-0.0224858	0.0193811	0.162677	0.0976631	0.0576136	0.162365	-0.0514902	0.0506908
apitolisib	0.0358412	0.0684273	-0.00995961	0.050881	0.0278862	0.171782	0.0976639	0.142252	0.298089	0.0346506	0.320661	0.0989213	-0.0687597	-0.0202039	0.0478058	-0.163105	-0.220359	-0.358612	-0.044982	0.0294436	-0.226922	-0.156216	-0.162497	0.0224091	0.0679295	0.182257	-0.161899	0.0428202	0.0613145	0.0863533	0.0254112	-0.0221011	0.265426	0.137631	0.108272	0.108672	0.144626	0.186696	0.208441	0.228567	0.209461	0.116958	0.140147	0.181482	0.179511	0.209703	0.155692	0.141332	0.0275578
pictilisib	0.0837141	-0.0201491	-0.125314	-0.0654724	-0.0492331	0.0898374	0.293314	0.0643149	-0.0243799	-0.135035	0.138483	0.00306488	-0.0710364	-0.331191	-0.211977	-0.140159	-0.0804309	-0.209982	-0.0439702	-0.0215543	-0.286394	-0.2696	-0.00286567	-0.01114	0.0777582	0.279184	-0.177921	-0.0457051	-0.0372185	0.100155	-0.0185521	-0.126507	0.193184	0.120783	0.170128	0.177529	0.226105	0.200489	0.219265	0.249399	0.159196	0.169409	0.157192	0.110737	0.141677	0.163289	0.131018	0.124368	0.000426612
buparlisib	0.344234	0.287705	0.271786	0.429102	0.380613	0.422457	0.482524	0.476412	0.394737	0.115274	0.321201	0.304659	0.185579	-0.0541574	0.2562	0.172443	0.100232	-0.181347	0.20333	0.25352	-0.200463	-0.00575941	0.0514431	0.488765	0.394337	0.192053	0.163726	0.306393	0.264062	0.295807	0.00995901	0.124199	0.442562	0.323444	0.10721	0.16182	0.199795	0.531997	0.648763	0.488995	0.526003	0.396549	0.49053	0.393042	0.43049	0.595103	0.547024	0.351072	0.478805
alpelisib	0.0214142	-0.00329994	-0.116118	0.0631341	-0.0556695	0.170342	0.309359	0.00469199	-0.0459573	-0.122689	0.012079	-0.0559906	-0.150164	-0.0510197	0.0929992	-0.0600649	-0.0214536	-0.1671	-0.117388	0.0675244	-0.404687	0.0102077	0.0491759	0.163518	0.150447	0.240229	0.130201	0.239135	0.0674717	0.00392562	0.0610449	0.0205886	0.360175	0.256517	0.128553	0.282379	0.33502	0.324308	0.34908	0.341767	0.294339	0.206016	0.230971	0.153335	0.284341	0.230048	0.305125	0.214966	0.135922
AZD-8055	0.0456264	0.132525	0.105103	0.0479149	-0.0278215	-0.0117776	-0.0126302	0.050802	0.0614848	-0.100654	0.0716324	0.0477607	-0.134732	-0.29041	-0.108898	-0.153918	-0.0303124	-0.185211	0.0308233	0.0498501	-0.0637833	0.0700557	-0.33241	-0.160515	-0.29299	0.112821	0.112401	0.22347	-0.153309	-0.10752	-0.113203	-0.148661	0.166816	0.0612771	0.148711	0.167957	0.212382	0.0847269	0.0715544	0.060071	0.0668444	0.0397224	0.0535254	0.165236	0.135316	0.071934	0.0223515	0.105817	-0.0311094
TGX-221	0.186432	0.0753046	0.236806	0.116831	0.0958303	0.118059	0.167028	0.229328	0.279706	0.273728	0.271527	0.119431	0.00476913	-0.119319	0.0618934	-0.0276452	-0.0610445	-0.229759	-0.0670197	-0.0387182	0.120851	0.155415	0.0461297	0.187252	0.0384169	0.198398	0.134213	0.256109	0.0960868	0.167768	0.0449217	-0.0604406	0.156563	0.0669769	0.16529	0.0275857	0.0287613	0.218736	0.208094	0.163866	0.300618	0.135565	0.176612	0.0937854	0.237996	0.465815	0.168029	0.115519	0.181286
idelalisib	0.205366	0.0269361	0.0359074	-0.00514145	-0.0821429	-0.0749374	0.0951274	0.159706	0.241812	0.221548	0.276941	-0.101049	-0.0923915	-0.0677486	-0.106673	0.0421637	-0.0070917	-0.109499	-0.128685	-0.0318846	0.134067	0.0236878	-0.0553088	0.0429097	-0.0883814	-0.0431445	0.0732601	0.186744	0.0858224	0.201634	0.0930125	0.101645	0.0550117	0.0496978	0.0586416	0.0417553	0.0647846	0.265415	0.152341	0.125381	0.214717	0.221156	0.07216	0.0567607	0.0973968	0.260445	0.0460129	0.0598082	0.10595
duvelisib	0.461765	0.160122	0.154824	0.0170052	-0.0777484	0.0740818	0.0636378	0.0943472	0.369225	0.204375	0.414771	0.140799	-0.113203	0.178459	0.142839	0.0585827	-0.0441669	-0.267392	-0.0678321	0.0448531	-0.288903	-0.00271673	-0.27905	-0.094385	-0.187285	0.0685619	0.0712238	0.108085	0.19305	0.222711	0.315576	0.157047	0.135703	0.129119	0.240848	0.208253	0.269844	0.186285	0.0529897	0.0824376	0.0826397	0.103292	0.0851759	0.0166271	0.277209	0.235358	0.0744071	0.295505	0.0359545
XAV-939	-0.185017	0.017591	-0.0868884	-0.112539	-0.114256	-0.0188457	-0.253939	-0.353502	-0.293863	-0.0439009	-0.00293244	-0.0953867	-0.152309	-0.00949553	0.0350234	-0.124492	-0.11412	0.0292473	0.188658	-0.00190865	0.075732	0.0227076	-0.0798296	-0.157125	-0.0640158	0.0200432	-0.227444	-0.0660667	-0.212428	-0.202891	-0.0836509	-0.236596	-0.09882	-0.0736488	0.102549	0.0120519	-0.0109662	-0.211913	-0.179178	-0.223443	-0.190877	-0.129346	-0.0777938	-0.0431584	-0.0294627	-0.153615	0.0282816	-0.177496	-0.309972
everolimus	0.135288	0.197591	0.138973	0.141081	0.0128989	0.350458	-0.14607	-0.00143351	0.143137	-0.125431	0.0591232	-0.0813132	-0.0595096	0.0382233	-0.021505	-0.0406998	0.0713343	0.180946	-0.113614	-0.0163972	0.10464	0.142263	-0.474611	-0.254368	-0.273167	-0.0266721	-0.091093	-0.0834403	-0.112633	-0.214737	0.0227897	0.116172	0.22993	0.227981	0.00530306	0.104792	0.137888	-0.0485729	-0.0650042	-0.0488225	-0.0776239	-0.0551944	-0.0906847	-0.0199362	-0.0976844	-0.301107	-0.0539553	-0.0605647	-0.108981
temsirolimus	0.119651	0.355052	0.217999	0.203116	0.131571	0.224019	-0.0720086	-0.0593414	-0.00215143	-0.0155476	0.118513	-0.0171973	-0.14947	0.193234	0.219288	-0.0712119	0.170367	0.176661	-0.143288	-0.045917	0.0624397	-0.0154781	-0.459339	-0.157403	-0.0111231	0.00406631	0.140005	0.0843198	-0.121188	-0.229178	0.160183	0.238079	0.211218	0.140424	0.128165	0.0371971	0.0588424	-0.148745	-0.0830277	-0.10757	-0.106949	0.0596601	0.133638	-0.197586	-0.0058004	-0.215964	-0.195387	-0.0101135	-0.0179418
quizartinib	0.344848	0.0172007	0.0979222	0.0337941	0.0941945	0.160122	0.0960882	0.0719947	0.179116	0.06831	0.181949	0.0212342	-0.131603	0.0766201	0.0635199	0.110607	0.002557	-0.241053	0.323104	0.0100365	-0.453125	-0.0730031	-0.20737	-0.0847223	-0.125847	-0.117067	0.0128739	0.00119294	0.132604	0.114813	0.111034	0.142583	0.104946	0.0626081	-0.0138197	-0.0491829	0.0218456	0.0391445	0.160955	0.103645	0.0945159	0.0711198	-0.0161556	0.143222	0.0856834	0.215101	0.152346	0.217718	0.188427
LGK-974	0.480649	0.235077	0.225196	0.284234	0.300071	0.245247	0.131693	0.0865773	0.0664631	-0.0281585	-0.0648807	0.04604	-0.0582953	0.33524	0.271738	0.0552582	0.0340292	0.0200345	-0.154558	-0.0394315	-0.392123	0.121294	-0.024488	0.0845078	0.0259183	0.0572691	0.079943	0.209849	0.269812	0.333701	0.252209	0.354965	-0.093866	-0.0776503	-0.25207	-0.210558	-0.119199	0.148041	0.056052	0.0685098	0.0931192	0.0407528	0.0810647	-0.168805	0.144377	0.0898913	0.0676107	0.198741	0.152032
momelotinib	0.124788	0.132821	0.0607137	0.242392	0.138184	0.351569	0.322975	0.343762	0.146608	-0.124218	0.0570693	0.227017	0.0444019	0.102961	0.342711	0.176248	0.0466844	-0.03174	0.0939349	-0.00967555	-0.185763	0.0974518	0.0373646	0.176298	0.14772	0.180348	0.0726071	0.237079	-0.00242113	0.173538	-0.00332478	0.0367615	0.14554	0.0855019	0.20316	0.25629	0.306913	0.145187	0.145419	0.0749292	0.0815335	0.255208	0.251012	0.303861	0.396875	0.289086	0.196726	0.341995	0.194144
ATRA	-0.128537	0.0124901	-0.0649344	-0.0790629	-0.104787	-0.176952	0.0821132	-0.153228	-0.132782	-0.316787	-0.0252338	-0.144986	-0.0577631	-0.111708	-0.180831	-0.0834825	-0.0751386	-0.0186088	0.0598668	0.185323	0.0129869	0.011953	-0.123374	-0.0880477	-0.138577	-0.112156	-0.0472613	0.0520137	-0.169408	-0.107108	-0.0756913	0.00278269	0.117666	0.080143	0.148012	0.205544	0.195243	0.130721	0.154676	0.140952	0.0886874	0.121599	-0.0923901	0.110041	0.147081	-0.0226171	0.0943209	-0.127324	-0.17674
mitomycin-C	0.401417	0.191095	0.1428	0.00645349	-0.0340044	0.00494132	0.153894	0.239344	0.281892	0.16202	0.263413	0.172251	-0.060177	0.00190755	-0.00520602	0.100611	0.00825549	-0.101602	0.0472938	0.200099	-0.15503	0.02055	-0.221561	-0.0576423	-0.0442965	0.094766	0.0681244	0.204383	0.0903326	0.145542	0.310572	0.309016	0.11159	0.0620723	0.000723004	0.0643351	0.0662896	0.380634	0.214539	0.151271	0.245252	0.238018	0.108836	0.242509	0.381048	0.295064	0.198434	0.253744	0.0689305
prednisolone	0.106034	-0.0121775	0.0215969	-0.0541307	-0.0889212	-0.0759266	-0.0220001	0.0908188	0.176459	0.0173139	0.06793	-0.0629059	-0.0586396	0.109666	0.0493922	0.0171787	0.0320939	-0.0380928	-0.0055214	-0.0534787	0.166568	0.137639	-0.0968156	-0.126078	-0.0832062	0.093967	0.171594	0.179033	-0.0300736	-0.0861219	0.249418	0.249343	5.67927e-05	-0.0143244	0.136851	-0.0200678	0.00983563	0.100821	0.0239406	0.146585	0.182342	0.238419	0.0458746	0.0762947	0.246753	0.147755	0.0246773	0.267303	0.0790103
dasatinib	0.000476924	0.184619	0.202329	-0.137526	0.00332621	0.0984321	-0.11448	0.128292	0.253215	0.00713616	0.183095	-0.0236409	-0.0340597	0.0907357	-0.165056	0.209086	0.0922517	0.0620277	0.149793	0.156169	0.0769981	0.142055	-0.17442	-0.178496	-0.198089	0.0870992	-0.213643	-0.163625	0.154298	0.1293	0.0522408	-0.0509385	0.124505	0.228377	0.129855	0.151228	0.218417	0.0142526	0.0900839	0.0732467	0.0182091	-0.0484069	-0.142805	0.20268	0.0861708	-0.106808	0.171438	0.0298291	0.0422205
bosutinib	0.408578	0.330357	0.391535	0.111326	0.37137	0.239959	0.108863	0.497831	0.45728	0.336278	0.300674	0.0388391	0.0957693	0.0914866	0.0327851	0.419001	0.256505	0.0754129	-0.0272204	0.0697325	0.142055	0.172401	-0.236309	-0.0264362	-0.0722771	-0.0808886	-0.000299221	-0.00524322	0.254415	0.388473	-0.0312782	0.076697	0.0952973	0.117712	0.150337	0.0318601	0.0426678	0.153678	0.243854	0.138688	0.25384	0.108602	0.104542	0.267305	0.110268	0.193623	0.263703	0.319106	0.42811
vandetanib	0.240086	0.366335	0.351252	-0.00335114	0.110328	0.317471	0.0993349	0.4293	0.436593	0.211818	0.380913	0.106668	0.0629492	0.198198	0.0690337	0.0968762	-0.0730383	-0.160823	-0.0255315	0.122891	0.11013	0.0526551	-0.361092	-0.168443	-0.13618	-0.294141	-0.408278	-0.347059	-0.0423138	0.0205697	-0.130834	-0.0320102	0.260198	0.22334	0.0989727	0.117967	0.11918	0.114404	0.124398	0.131944	0.133237	0.110978	0.102121	0.261371	0.107191	0.150038	0.136502	0.119177	0.177417
BGJ398	0.0612402	0.313463	0.231612	0.0670474	0.041205	0.143295	0.0929909	0.206295	-0.066563	-0.224597	-0.0706635	-0.0384295	-0.0881406	0.0185227	0.0532244	-0.127653	-0.155976	-0.200266	0.0128182	0.137981	-0.0903745	-0.00719429	-0.0807184	0.00986293	0.046616	0.0217865	-0.0798706	-0.13688	-0.190906	-0.177369	-0.0480338	-0.000961416	0.280462	0.125645	-0.0278072	0.0817496	0.12071	0.219283	0.133713	0.196326	0.129897	0.200143	0.118821	0.140673	0.0418051	0.23945	0.135325	0.0144466	0.157042
dactolisib	-0.0923604	0.193436	0.165433	0.0634737	0.0531105	0.130856	0.012958	0.241443	0.201237	-0.0374014	0.133067	0.208414	0.290603	-0.0790494	0.025456	-0.183013	-0.0651396	-0.288842	-0.083074	0.035349	0.18409	-0.0246196	-0.363752	-0.114804	-0.0687687	-0.26791	-0.167658	-0.166433	-0.254126	-0.179103	-0.25555	-0.167999	0.166291	-0.00660078	-0.0301214	0.0122383	-0.03809	0.0785227	0.0607473	-0.010514	0.0573717	0.0878601	0.0175751	0.280378	-0.0405975	0.00812263	-0.0194504	-0.128435	-0.0154454
[truncated: 73 more columns]

## Sheet: S3E_Ibrutinib_biochemicalIC50s
Table S3E. Selectivity profiling of ibrutinib against 311 wild-type and mutant kinases in enzyme assays (measured at Carna Biosciences).
Percent inhibition of kinase activity in the presence of 300 nM ibrutinib. Kinases inhibited by more than 50 % are indicated in bold.
*Kinases that contain a cysteine in the ATP binding pocket corresponding to cysteine 481 in BTK.
Tyrosine kinases							Serine/Threonine Kinases
ABL	2,4	EPHB3	-1,7	KIT(V654A)	-0,5		AKT1	-4,0	CLK3	-1,8	MAP3K4	-2,2
ABL(E255K)	-2,7	EPHB4	6,0	LCK	100,8		AKT2	-4,5	COT	1,2	MAP3K5	42,6
ABL(T315I)	-0,5	FAK	-2,6	LTK	0,0		AKT3	-2,0	CRIK	-2,5	MAP4K2	1,4
ACK	11,7	FER	0,1	LYNa	92,7		AMPKα1/β1/γ1	0,7	DAPK1	2,0	MAPKAPK2	2,1
ALK	-1,8	FES	-0,5	LYNb	96,8		AMPKα2/β1/γ1	-0,1	DCAMKL2	-1,8	MAPKAPK3	0,6
ALK(F1174L)	-0,5	FGFR1	33,9	MER	-4,1		AurA	7,4	DLK	5,4	MAPKAPK5	-1,5
ALK(L1196M)	-1,1	FGFR2	50,8	MET	11,8		AurA/TPX2	-4,2	DYRK1A	-3,8	MARK1	-5,2
ALK(R1275Q)	0,4	FGFR3	49,1	MET(Y1235D)	0,1		AurB	0,4	DYRK1B	-4,6	MARK2	1,8
EML4-ALK	-5,0	FGFR3(K650E)	23,8	MUSK	-0,7		AurC	-1,3	DYRK2	-7,5	MARK3	-1,1
NPM1-ALK	-1,6	FGFR3(K650M)	6,6	PDGFRα	73,3		BMPR1A	-5,5	DYRK3	-2,7	MARK4	3,3
ARG	1,4	FGFR4	13,7	PDGFRα(T674I)	2,7		BRAF	-5,6	EEF2K	-1,3	MELK	3,4
AXL	1,7	FGFR4(N535K)	-0,5	PDGFRα(V561D)	60,3		BRAF(V600E)	4,9	Erk1	0,2	MGC42105	-1,2
BLK*	102,7	FGFR4(V550E)	-1,8	PDGFRβ	21,1		BRSK1	-0,9	Erk2	-3,8	MINK	-4,1
BMX*	103,4	FGFR4(V550L)	0,7	PYK2	-1,4		BRSK2	2,8	Erk5	-3,4	MLK1	-15,0
BRK	95,0	FGR	97,2	RET	64,1		CaMK1α	-1,5	GSK3α	-2,0	MLK2	16,6
BTK*	104,3	FLT1	39,0	RET(G691S)	59,3		CaMK1δ	-5,8	GSK3β	-7,0	MLK3	-22,7
CSK	98,9	FLT3	35,2	RET(M918T)	34,3		CaMK2α	-5,2	Haspin	-5,6	MNK1	0,0
DDR1	7,6	FLT4	68,2	RET(S891A)	56,3		CaMK2β	-3,6	HGK	-6,2	MNK2	0,5
DDR2	4,9	FMS	5,1	RET(Y791F)	60,9		CaMK2γ	-4,8	HIPK1	-3,3	MOS	3,8
EGFR*	100,7	FRK	80,7	RON	-3,9		CaMK2δ	-3,5	HIPK2	-1,8	MRCKα	0,0
EGFR(d746-750)	52,8	FYN	94,0	ROS	-3,1		CaMK4	-1,8	HIPK3	-1,9	MRCKβ	3,5
EGFR(d746-750/T790M)	19,4	HCK	97,7	SRC	80,3		CDC2/CycB1	-5,5	HIPK4	2,2	MSK1	-3,3
EGFR(L858R)	79,0	HER2*	100,3	SRM	97,1		CDC7/ASK	-9,6	IKKα	-9,4	MSK2	-3,0
EGFR(L861Q)	88,2	HER4*	98,8	SYK	-9,2		CDK2/CycA2	-4,6	IKKβ	0,8	MSSK1	-1,7
EGFR(T790M)	66,9	IGF1R	-4,6	TEC*	103,6		CDK2/CycE1	0,8	IKKε	-5,4	MST1	0,5
EGFR(T790M/L858R)	38,1	INSR	-2,6	TIE2	2,8		CDK3/CycE1	-4,6	IRAK1	-0,6	MST2	2,0
EPHA1	11,7	IRR	3,1	TNK1	-2,4		CDK4/CycD3	8,4	IRAK4	-1,9	MST3	3,7
EPHA2	-5,6	ITK*	73,5	TRKA	12,4		CDK5/p25	-3,0	JNK1	-2,5	MST4	-1,1
EPHA3	-7,1	JAK1	-2,0	TRKB	5,6		CDK6/CycD3	-0,4	JNK2	-4,2	NDR1	-5,2
EPHA4	-3,9	JAK2	-0,6	TRKC	7,3		CDK7/CycH/MAT1	-3,7	JNK3	-2,5	NDR2	-4,2
EPHA5	3,1	JAK3*	67,1	TXK*	99,5		CDK9/CycT1	-2,7	LATS2	-2,3	NEK1	0,4
EPHA6	60,5	KDR	40,0	TYK2	-7,1		CGK2	-5,2	LIMK1	6,1	NEK2	-4,7
EPHA7	-2,3	KIT	27,8	TYRO3	-0,1		CHK1	-0,8	LKB1	1,6	NEK4	-4,4
EPHA8	20,5	KIT(D816V)	-0,8	YES	97,2		CHK2	1,9	LOK	-0,2	NEK6	0,8
EPHB1	-1,9	KIT(T670I)	-1,5	ZAP70	0,7		CK1α	-20,4	MAP2K1	20,6	NEK7	-0,9
EPHB2	3,2	KIT(V560G)	-1,5				CK1γ1	-1,5	MAP2K2	22,8	NEK9	-3,8
							CK1γ2	-1,1	MAP2K3	4,9	NuaK1	1,9
							CK1γ3	0,3	MAP2K4	1,8	NuaK2	2,1
							CK1δ	-0,5	MAP2K5	-1,4	p38α	-3,6
							CK1ε	25,6	MAP2K6	10,6	p38β	-1,8
							CK2α1/β	-11,6	MAP2K7	35,1	p38γ	-1,6
							CK2α2/β	-4,7	MAP3K1	-18,9	p38δ	-0,9
							CLK1	-6,1	MAP3K2	27,2	p70S6K	3,1
							CLK2	-2,8	MAP3K3	37,1	p70S6Kβ	-0,3
							PAK1	-6,2	PKCγ	-1,1	RSK4	-2,6
							PAK2	0,2	PKCδ	4,4	SGK	-1,2
							PAK3	-26,0	PKCε	2,0	SGK2	2,5
							PAK4	-4,9	PKCζ	-0,4	SGK3	2,2
							PAK5	-3,6	PKCη	1,3	SIK	-2,6
							PAK6	-11,2	PKCθ	1,2	skMLCK	-2,6
							PASK	0,8	PKCι	2,2	SLK	-0,1
							PBK	-0,5	PKD1	-1,9	SRPK1	5,5
							PDHK2	5,1	PKD2	2,7	SRPK2	-1,0
							PDHK4	-2,8	PKD3	-6,9	TAK1-TAB1	-7,9
							PDK1	-8,9	PKN1	2,6	TAOK2	-3,0
							PEK	11,1	PKR	-2,5	TBK1	-1,9
							PGK	-5,3	PLK1	3,4	TNIK	-2,1
							PHKG1	-1,2	PLK2	6,0	TSSK1	-5,3
							PHKG2	-2,0	PLK3	-3,9	TSSK2	-1,2
							PIM1	0,1	PLK4	7,9	TSSK3	8,4
							PIM2	4,9	PRKX	-6,5	TTK	-4,8
							PIM3	0,7	QIK	-5,9	WEE1	-1,4
							PKACα	-3,4	RAF1	6,0	WNK1	-2,6
							PKACβ	-4,2	ROCK1	-3,8	WNK2	-1,9
							PKACγ	-7,1	ROCK2	-1,6	WNK3	-1,1
							PKCα	4,2	RSK1	-2,7	PIK3CA/PIK3R1	20,4
							PKCβ1	-1,0	RSK2	1,5	SPHK1	-1,3
							PKCβ2	1,1	RSK3	0,4	SPHK2	-5,3
