# Supplementary material for: Cell Panel Profiling Reveals Conserved Therapeutic Clusters and Differentiates the Mechanism of Action of Different PI3K/mTOR, Aurora Kinase and EZH2 Inhibitors
Source: Oxford University Press journal article supplement (doi:10.1158/1535-7163.mct-16-0403), 2016-09-01
Supplement: 15357163mct160403-sup-168145_1_supp_3617445_jblj0y.xlsx [file 15357163mct160403-sup-168145_1_supp_3617445_jblj0y.xlsx]

## Sheet: S4A_APC_clustering
Table S4A: Affinity Propagation Clustering (APC) of all compound profiles, and comparison to hierarchical clustering results
1: Clusters numbers and named copied from hierarchical clustering (Table 2)
2: An exemplar is the most representative compound in the cluster, as determined by the APC method (ref. 26)
3: compounds assigned to cluster by APC method
green	validated cluster (see Table 2)
red	cluster found in hierarchical method, but not with APC method
yellow	cluster found with APC method, but not with hierarchical method
cluster no.1	cluster name1	exemplar2	compounds3
1	BET	JQ1	I-BET-762	JQ1
2	no. 2	fluorouracil	fluorouracil
3	purine analogs	thioguanine	thioguanine	dacarbazine	mercaptopurine
4	selective ABL	imatinib	masitinib	imatinib	nilotinib	ponatinib
5	BCL2	navitoclax	navitoclax	ABT-737
6	no. 6	actinomycin-D	actinomycin-D	PHA-793887
7	covalent EGFR	afatinib	afatinib	ibrutinib
8	ATRA	ATRA	ATRA
9	Aurora B/C	AMG-900	AMG-900	GSK-1070916	tozasertib
10	taxane-like	docetaxel	AT-7519	docetaxel	ICG-001	paclitaxel	vincristine
11	multikinase VEGFR / PDGFR	cabozantinib	axitinib	cabozantinib	nintedanib	pazopanib	vatalinib	regorafenib	sorafenib
12	MEK	PD-0325901	selumetinib	PD-0325901	trametinib
13	competitive mTOR	AZD-8055	AZD-8055
14	FGFR	BGJ-398	BGJ-398
15	PLK	vinflunine	BI-2536	carfilzomib	dinaciclib	GSK-461364	vinflunine	volasertib	GSK-126	KU-60019	TH-588
16	no. 16
17	pan-PI3-kinase	apitolisib	buparlisib	alpelisib	apitolisib	pictilisib
18	FGFR4	BLU-9931	BLU9931
19	proteasome	bortezomib	bortezomib
20	multikinase ABL	bosutinib	bosutinib	vandetanib
21	Aurora A	MLN-8054	busulfan	MK-5108	MLN-8054
22	PI3-kinase β/γ/δ	idelalisib	idelalisib	duvelisib	TGX-221
23	platin-like
24	IGF-1R	GSK-1838705A	ceritinib	GSK-1838705A	NVP-ADW742
25	Wee1/CHK1	SCH-900776	CHIR-124	MK-1775	SCH-900776
26	no. 27	cytarabine	cisplatin	cytarabine	danusertib
27	RAF	dabrafenib	dabrafenib	vemurafenib
28	topoisomerase	etoposide	BIIB-021	carboplatin	daunorubicin	doxrubicin	etoposide	irinotecan	melphalan	mitoxantrone	MK-2206	SN-38	topotecan
29	HDAC / PARP	panobinostat	entinostat	panobinostat	olaparib	vorinostat
30	EZH2 no.1	GSK-343	EPZ-005687	GSK-343	UNC-1999
31	no. 31	EPZ-5676	EPZ-5676	temozolomide	ruxolitinib
32	EZH2 no.2	EPZ-6438	EPZ-6438
33	EGFR	neratinib	erlotinib	gefitinib	lapatinib	neratinib	pelitinib
34	rapalogs	everolimus	everolimus	temsirolimus
35	no. 35	roscovitine	venetoclax	roscovitine	nutlin 3a
36	TTK	MPI-0479605	MPI-0479605	NMS-P715
37	porcine	LGK-974	LGK-974
38	methothrexate	methothrexate	methothrexate
39	multikinase 3	sunitinib	Mps1-IN-1	sunitinib	crizotinib	epothilone B	gemcitabine
40	no. 40	mitomycin-C	mitomycin-C
41	CDK4/6	palbociclib	palbociclib
42	FLT3	quizartinib	quizartinib
43	no. 43	mubritinib	mubritinib
44	tankyrase	XAV-939	XAV-939
45	dasatinib	dasatinib	dasatinib
46	PI3K/mTOR	dactolisib	dactolisib
47	prednisolone	prednisolone	prednisolone
48	momelotinib	momelotinib	momelotinib

## Sheet: S4B_clustering_with_NCI60_data
Table S4B: Clustering with the hierarchical method of 51 compounds using NCI-60 data
Only compounds were analyzed that were profiled both in our study and at NCI-60. Clusters were determined on basis of NCI-60 profiling data. Correlation cut-off applied is 0.3
1: Numbers and names refer to overlap with the clusters in Table 2. Cluster no. 28 is split into two in this analysis. Clusters no. 7 + 33, and 12 + 27 are joined.
green	validated cluster (see Table 2)
cluster no.	cluster name1	compounds
1		actinomycin-D	carfilzomib	paclitaxel
2	33-EGFR / 7- EGFR	afatinib	erlotinib	gefitinib	ibrutinib	lapatinib
3	11_multikinase_PDGFR	axitinib	bortezomib	pazopanib
4	4_selective_ABL	bosutinib	imatinib	ponatinib
5	23_platin_like	busulfan	carboplatin	cisplatin	melphalan
6		cabozantinib	navitoclax
7		crizotinib	sunitinib
8	12-MEK / 27-RAF	dabrafenib	selumetinib	trametinib	vemurafenib
9		dacarbazine
10		dasatinib
11	28_topoisomeraseI_campthothecins	daunorubicin	doxorubicin	epirubicin	etoposide
12	10_taxane_like	docetaxel	vincristine
13	29_HDAC	entinostat	vorinostat
14		epothilone B
15	34_rapalogs	everolimus	temsirolimus
16		fluorouracil	methotrexate
17	28_topo-isomeraseII_anthracyclins	gemcitabine	irinotecan	mitomycin-C	mitoxantrone	topotecan
18	3_purine_analogs	mercaptopurine	thioguanine
19		roscovitine
20		sorafenib
21		temozolomide
													1
												EGFR	1
												multikinase VEGFR	1
													1
												platins	1
													1
													1
												MEK / BRAF	1
												topo-isomerase II	1
												taxane-like	1
												HDAC inhibitors	1
												rapalogs	1
													1
												topo-isomerase I	1
												purine	1
													15
														1		fluorouracil
													1	2	3_purine_analogs	thioguanine	dacarbazine	mercaptopurine
													1	3		navitoclax	busulfan
													1	4		actinomycinD	carfilzomib	irinotecan
													1	5	33-EGFR / 7- EGFR	afatinib	gefitinib	lapatinib	topotecan	ibrutinib
													1	6	11_multikinase_PDGFR	axitinib	cabozantinib	pazopanib	sorafenib
													1	7	12-MEK	selumetinib	trametinib
														8		bortezomib
													1	9	4_selective_ABL	bosutinib	imatinib	ponatinib
													1	10	23_platin_like	carboplatin	cisplatin	melphalan
													1	11	29_HDAC	crizotinib	entinostat	sunitinib	temozolomide	vorinostat
													1	12	27-RAF	dabrafenib	vemurafenib
														13		dasatinib
													1	14	28_topo_isomerase	daunorubicin	doxorubicin	epirubicin	etoposide	mitoxantrone
													1	15	10_taxane_like	docetaxel	paclitaxel	vincristine
													1	16		epothilone B	erlotinib
													1	17	34_rapalogs	everolimus	temsirolimus
														18		gemcitabine
														19		methotrexate
														20		mitomycinC
														21		roscovitine
													14

## Sheet: S4C_extended_Table2
Table S4C: Extended version of Table 2, including cluster names and compounds described in the literature
green	cluster containing at least two compounds with the same biochemical mechanism
1: Numbers and names refer to overlap with the clusters in Table 2.
2: Indicated are cluster names through gene names of main targets. Only selected compounds are indicated. All compounds in these clusters can be found on the Cancer Therapeutics Research Portal website
no.1	cluster name1	APC (Table S4A)	NCI-60 51 inh. (Table S4B)	Garnett et al (2012, GDSC)	Greshock et al. (2010, GSK)	Holbeck et al. (2010, NCI-60)	Dan et al. (2002, JFCR-39)	Nakatsu et al. (2007, JFCR-39)	Ludlow-Seashore et al. (2015, CTRP)2
1	BET								BRD2,3,4
2	no. 2							A3 (fluoro-uracil)
3	purine analogs					arabinose nucleosides (mercaptopurine, thioguanine, fludarabine)	thioguanine, mercaptopurine
4	selective ABL			C13 (imatinib, nilotinib, crizotinib, etc)		BCR-ABL (imatinib, nilotinib)			ABL1, BCR, KIT
5	BCL2								(BCL2, BC2L1, BCL2L2) or (BCL2, BCL2L1)
6	no. 6					DNA-binding (mitramycin, actinomycin-D)	actinomycin-D
7	covalent EGFR
8	ATRA							I1 (ATRA)	RARA, RARB, RARG
9	Aurora B/C				C: mitosis (GSK-1070916, GSK-461364)				AURKB
10	taxane-like			C16 (vinblastine, docetaxel, etc)		tubulin (paclitaxel, vinblastine, docetaxel, vincristine, vinorelbine)	vindecine, docetaxel, paclitaxel, vincristine, vinblastine
11	multikinase VEGFR / PDGFR			C10 (pazopanib, dasatinib, WH-4-023, etc)	E: VEGFR (sunitinib, pazopanib)				(PDGFRA) or (PDGFRB)
12	MEK			C1 (PD-0325901, selumetinib, RDEA-119 etc)	G: trametinib, AZD-628)				MAPK1, MAPK2
13	competitive mTOR			C22 (dactolisib, AZD-8055, pictilisib)
14	FGFR
15	PLK			C4 (BI-2536, GW843682X, paclitaxel, etc)					PLK1
16	no. 16
17	pan-PI3-kinase								(PI3KCG) or (PI3KCA) or (PI3KCD)
18	FGFR4
19	proteasome								PSMD1, PSMD2, PSMB1, PSMB2
20	multikinase ABL
21	Aurora A
22	PI3-kinase β/γ/δ				B: PI3K/AKT/mTOR (TGX-221, dactolisib)				(PI3KCG) or (PI3KCD)
23	platin-like					alkylating (cisplatin, carboplatin, busulfan, melphalan, etc.)	cisplatin, carboplatin	F2 (cisplatin) + H1 (vincristine, vinblastine)
24	IGF-1R			C9 (BMS-536924, OSI-906, etc)	A: IGF-1R (GSK-1838705, GSK-1139710)				IGF1R
25	Wee1/CHK1
26	no. 27
27	RAF			C15 (PLX-4720, SB-590885, etc)					BRAF1
28	topoisomerase			C11 (camptothecin, vorinostat, olaparib)		anthracyclins (doxorubicin, epirubicin, daunorubicin) + camptothecins (irinotecan, topotecan, etoposide)	irinotecan, SN-38, etoposide, mitoxantrone, doxorubicin, daunorubicin, epirubicin	A1 (irinotecan, SN-38, mitomycin-C)	(TOP1) or (TOP2A)
29	HDAC / PARP								panHDAC
30	EZH2 no.1
31	no. 31
32	EZH2 no.2
33	EGFR			C19 (afatinib, erlotinib, lapatinib, gefitinib, etc)	D: EGFR /ERBB2 (lapatinib, neratinib, erlotinib)	kinase: EGFR (gefitinib, lapatinib, erlotinib, dasatinib)			EGFR
34	rapalogs			C18 (rapamycin, JW-7-52-1, etc)		mTOR (temsirolimus, everolimus)			mTOR
35	no. 35
36	TTK
37	no. 37
38	no. 38					methotrexate	methothrexate	A2 (methothrexate)
39	multikinase 3
40	no. 40
41	CDK 4/6
42	FLT3
43	no. 43
44	no .44
45						hormonal (ER-antagonists, raloxifene, toremifene)	tamoxifene, toremifene	K1 (toremifene, raloxifene)
46						hormonal2 (aromatase inhibitors, exemestane, letrozole)
47						antimetabolites (gemcitabine / cytarabine)
48						DNA-damage (bleomycin/ streptozotocin)
49						cluster 28 split into anthracyclins and camptothecins			(TOP1) or (TOP2A)
50				C17 farnesyltransferases (tipifarnib, FTI-277)
51				C21 AMPK inhibitors (metformin, AICAR)
52				C8 Src inhbiitors (A-770041, AZD-0530)					SRC: dasatinib, saracitinib
53					F: MET inhibitors (foretinib, PHA-665752)				MET
54									JAK2
55									MDM2
56									EHMT
57									DRD2
58									ATM
59									HDAC6
60									ERBB2
61									XIAP
62									NAMPT
63									EIF4 isoforms
64									CDK2/7/9
65									CDK1/2
66									HSP90
67									PSMB5
68									HMGCR
69									BRAF spectrum-selective: sorafenib, regorafenib
70									(PI3KCG) or (PI3KCA) or (PI3KCD)
71									(PDGFRA) or (PDGFRB)
72									(BCL2, BC2L1, BCL2L2) or (BCL2, BCL2L1)
